# Supplementary material for: Dendritic phosphoramidite ligands for Rh-catalyzed [2+2+2] cycloaddition reactions: unprecedented enhancement of enantiodiscrimination
Source: Royal Society of Chemistry journal article supplement (doi:10.1039/c2cc32992a), 2012-01-01
Supplement: c2cc32992a.pdf [file c2cc32992a.pdf]

**Electronic Supplementary Information (ESI) for:**

**Dendritic Phosphoramidite Ligands for Rh-catalyzed [2+2+2]  
Cycloaddition Reactions: Unprecedented Enhancement of  
Enantiodiscrimination**

**Lidia Garcia,<sup>a,b</sup> Anna Roglans,<sup>a</sup> Régis Laurent,<sup>b</sup> Jean-Pierre Majoral,<sup>b</sup> Anna Pla-Quintana,<sup>\*a</sup> Anne-Marie Caminade<sup>\*b</sup>**

<sup>a</sup> *Departament de Química, Universitat de Girona, Facultat de Ciències, Campus de Montilivi, s/n, E-17071 Girona (Spain), Fax: (+) 34 972 41 81 50; Tel: (+) 34 972 41 82 75; E-mail: anna.plaq@udg.edu.*

<sup>b</sup> *Laboratoire de Chimie de Coordination, CNRS, 205 route de Narbonne, 31077 Toulouse Cedex 4, France, Fax: (+) 33 561 55 30 03; Tel: (+) 33 561 33 31 25; E-mail: caminade@lcc-toulouse.fr.*

**Contents**

---

|                                                                                                                                                                                               |         |
|-----------------------------------------------------------------------------------------------------------------------------------------------------------------------------------------------|---------|
| <b>1.</b> General information                                                                                                                                                                 | S2      |
| <b>2.</b> Synthesis of dendrimers <b>A-Gn</b> : synthetic procedures and characterization data                                                                                                | S2-S4   |
| <b>3.</b> Synthesis of dendrimers <b>Gn</b> : general procedure and characterization data                                                                                                     | S4-S6   |
| <b>4.</b> Full representation of dendrimer <b>G3</b>                                                                                                                                          | S7      |
| <b>5.</b> Synthesis of the monomeric phosphoramidite ligand <b>M</b> and characterization data                                                                                                | S8      |
| <b>6.</b> Synthesis of the dimeric phosphoramidite branch <b>B</b> and characterization data                                                                                                  | S9-S11  |
| <b>7.</b> Rhodium-catalyzed [2 + 2 + 2] cycloaddition of <i>N,N</i> -bis(2-butynyl)-(4-methylphenyl)-sulfonamide <b>1</b> with phenylacetylene <b>2</b> . General Procedure                   | S12     |
| <b>8.</b> Rhodium-Catalyzed Enantioselective [2 + 2 + 2] Cycloaddition of <i>N,N</i> -bis(2-butynyl)-(4-methylphenyl)sulfonamide <b>1</b> with alkynyl substrate <b>4</b> . General Procedure | S12     |
| <b>9.</b> <sup>31</sup> P { <sup>1</sup> H} NMR, <sup>1</sup> H NMR and <sup>13</sup> C { <sup>1</sup> H} NMR spectra of dendrimers <b>A-Gn</b>                                               | S13-S17 |
| <b>10.</b> <sup>31</sup> P { <sup>1</sup> H} NMR, <sup>1</sup> H NMR and <sup>13</sup> C { <sup>1</sup> H} NMR spectra of dendrimers <b>Gn</b>                                                | S17-S21 |
| <b>11.</b> <sup>31</sup> P { <sup>1</sup> H} NMR, <sup>1</sup> H NMR and <sup>13</sup> C { <sup>1</sup> H} NMR spectra of <b>M</b> and <b>B</b>                                               | S21-S24 |
| <b>12.</b> HPLC chromatograms of compounds <b>5</b>                                                                                                                                           | S25-S30 |

---

## 1. General information.

Unless otherwise noted, materials were obtained from commercial sources and used without further purification.

All syntheses of dendritic ligands and [2+2+2] cycloaddition reactions were carried out with standard high-vacuum and dry-nitrogen techniques. Toluene and THF were distilled under a nitrogen atmosphere over sodium as drying agent. When necessary, reaction mixtures were chromatographed in a silica gel column (230–400 mesh) or alumina gel column (particle size 0.05–0.15 mm) using a gradient solvent system as the eluent. NMR and mass spectroscopic data obtained for [2+2+2] cycloadducts were identical to previously reported data.  $^1\text{H}$ ,  $^{13}\text{C}$ , and  $^{31}\text{P}$  NMR spectra were recorded with Bruker ARX250, DPX300, AV300 or AV400 spectrometers. References for NMR chemical shifts are 85%  $\text{H}_3\text{PO}_4$  for  $^{31}\text{P}$  NMR,  $\text{SiMe}_4$  for  $^1\text{H}$  and  $^{13}\text{C}$  NMR. NMR signal attribution was carried out using Jmod, two dimensional HBMC and HMQC, or CW  $^{31}\text{P}$  decoupling experiments when necessary.

## 2. Synthesis of dendrimers A-Gn.

The corresponding aldehyde-capped dendrimer (0.35 mmol –  $n = 1$ , 0.15 mmol –  $n = 2$ , 0.21 mmol –  $n = 3$ ) was added to an ice-cooled solution of *n*-butylamine (7.08 mmol –  $n = 1$ , 6.07 mmol –  $n = 2$ , 15.58 mmol –  $n = 3$ , respectively) in THF (25 mL, 11 mL, 15 mL, respectively) and in the presence of molecular sieves. The reaction mixture was kept at room temperature for 24 hours before filtering through cannula and evaporated under reduced pressure. After this, the residue was then dissolved in THF:MeOH 1.5:1 (166 mL, 70 mL, 100 mL, respectively) and ice-cooled.  $\text{NaBH}_4$  (11.20 mmol, 9.80 mmol, 26.44 mmol, respectively) was then slowly added and the reaction mixture was left to reach room temperature. After 18 hours, the reaction was quenched by the addition of water and concentrated under reduced pressure. The mixture was then diluted in 50 mL of dichloromethane and was washed with saturated  $\text{NaHCO}_3$  solution, water and brine (20 mL each), dried over  $\text{MgSO}_4$  and filtered. The removal of the solvent under reduced pressure yielded the corresponding product as a colorless foam.

**A-G1** was obtained in an 89 % yield (2 steps).

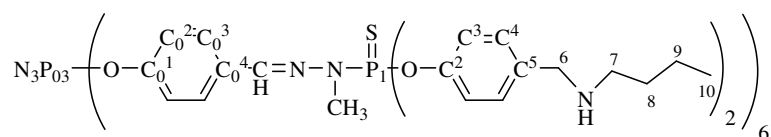

$^{31}\text{P}$  { $^1\text{H}$ } NMR (121 MHz,  $\text{CDCl}_3$ )  $\delta$  62.78 (s,  $\text{P}_1$ ), 8.51 (s,  $\text{P}_0$ ).  $^1\text{H}$  NMR (250 MHz,  $\text{CDCl}_3$ )  $\delta$  7.62 (d,  $^3J_{\text{HH}} = 8.6$  Hz, 12H,  $\text{H-C}_0^3$ ), 7.59 (s, 6H,  $\text{CH=N-N-P}_1$ ), 7.24 (d,  $^3J_{\text{HH}} = 8.6$  Hz, 24H,  $\text{H-C}^4$ ), 7.14 (d,  $^3J_{\text{HH}} = 7.5$  Hz, 24H,  $\text{H-C}^3$ ), 7.01 (d,  $^3J_{\text{HH}} = 8.6$  Hz, 12H,  $\text{H-C}_0^2$ ), 3.71 (s, 24H,  $\text{C}^6\text{H}_2\text{-N}$ ), 3.24 (d,  $^3J_{\text{HP}} = 10.2$  Hz, 18H,  $\text{CH}_3\text{-N-P}_1$ ), 2.60 (t,  $^3J_{\text{HH}} = 7.1$  Hz, 24H,  $\text{N-C}^7\text{H}_2$ ), 1.69 – 1.41 (m, 36H,  $\text{C}^8\text{H}_2$ , NH), 1.24 – 1.40 (sx,  $^3J_{\text{HH}} = 7.1$  Hz, 24H,  $\text{C}^9\text{H}_2$ ), 0.90 (t,  $^3J_{\text{HH}} = 7.2$  Hz, 36H,  $\text{C}^{10}\text{H}_3$ ).  $^{13}\text{C}$  { $^1\text{H}$ } NMR (75 MHz,  $\text{CDCl}_3$ )  $\delta$  151.2 (d,  $^2J_{\text{CP}} = 7.2$  Hz,  $\text{C}_0^1$ ), 149.5 (d,  $^2J_{\text{CP}} = 7.2$  Hz,  $\text{C}^2$ ), 138.4 (d,  $^3J_{\text{CP}} = 14.2$  Hz,  $\text{CH=N-N-P}_1$ ), 137.7 (d,  $^5J_{\text{CP}} = 1.4$  Hz,  $\text{C}^5$ ), 132.2 (s,  $\text{C}_0^4$ ), 129.2 (s,  $\text{C}^4$ ), 128.2 (s,  $\text{C}_0^3$ ), 121.4 (bs,  $\text{C}_0^2$ ), 121.2 (d,  $^3J_{\text{CP}} = 4.6$  Hz,  $\text{C}^3$ ), 53.3 (s,  $\text{C}^6$ ), 49.2 (s,  $\text{C}^7$ ), 33.0 (d,  $^2J_{\text{CP}} = 12.1$  Hz,  $\text{CH}_3\text{-N-P}_1$ ), 32.1 (s,  $\text{C}^8$ ), 20.4 (s,  $\text{C}^9$ ), 14.0 (s,  $\text{C}^{10}$ ). Anal. Calcd for  $\text{C}_{180}\text{H}_{240}\text{N}_{27}\text{O}_{18}\text{P}_9\text{S}_6$  (3541.16): C, 61.05; H, 6.83; N, 10.68. Found: C, 61.18; H, 6.88; N, 10.72.

**A-G2** was obtained in a 78 % yield (2 steps).

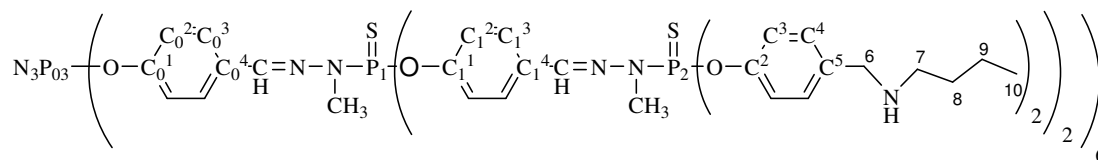

$^{31}\text{P}$  { $^1\text{H}$ } NMR (161 MHz,  $\text{CDCl}_3$ )  $\delta$  62.89 (s,  $\text{P}_2$ ), 62.41 (s,  $\text{P}_1$ ), 8.54 (s,  $\text{P}_0$ ).  $^1\text{H}$  NMR (400 MHz,  $\text{CDCl}_3$ )  $\delta$  7.64 (d,  $^3J_{\text{HH}} = 8.4$  Hz, 36H,  $\text{H-C}_0^3$ ,  $\text{H-C}_1^3$ ), 7.56 (s, 18H,  $\text{CH=N-N-P}_1$ ,  $\text{CH=N-N-P}_2$ ), 7.27 – 7.21 (m, 48H,  $\text{H-C}^4$ ), 7.19 (d,  $^3J_{\text{HH}} = 8.0$  Hz, 24H,  $\text{H-C}_1^2$ ), 7.14 (d,  $^3J_{\text{HH}} = 8.0$  Hz, 48H,  $\text{H-C}^3$ ), 6.93 (d,  $^3J_{\text{HH}} = 8.3$  Hz, 12H,  $\text{H-C}_0^2$ ), 3.71 (s, 48H,  $\text{C}^6\text{H}_2\text{-N}$ ), 3.28 (d,  $^3J_{\text{HP}} = 10.2$  Hz, 36H,  $\text{CH}_3\text{-N-P}_2$ ), 3.22 (d,  $^3J_{\text{HP}} = 10.2$  Hz, 18H,  $\text{CH}_3\text{-N-P}_1$ ), 2.58 (t,  $^3J_{\text{HH}} = 6.8$  Hz, 48H,  $\text{N-C}^7\text{H}_2$ ), 1.52 – 1.40 (m, 72H,  $\text{C}^8\text{H}_2$ , NH), 1.25 – 1.39 (sx,  $^3J_{\text{HH}} = 6.8$  Hz, 48H,  $\text{C}^9\text{H}_2$ ), 0.89 (t,  $^3J_{\text{HH}} = 7.2$  Hz, 72H,  $\text{C}^{10}\text{H}_3$ ).  $^{13}\text{C}$  { $^1\text{H}$ } NMR (100 MHz,  $\text{CDCl}_3$ )  $\delta$  151.2 (d,  $^2J_{\text{CP}} = 7.1$  Hz,  $\text{C}_0^1$ ,  $\text{C}_1^1$ ), 149.4 (d,  $^2J_{\text{CP}} = 7.0$  Hz,  $\text{C}^2$ ), 139.0 (d,  $^3J_{\text{CP}} = 13.6$  Hz,  $\text{CH=N-N-P}_1$ ), 138.4 (d,  $^3J_{\text{CP}} = 13.7$  Hz,  $\text{CH=N-N-P}_2$ ), 137.8 (s,  $\text{C}^5$ ), 132.4 (s,  $\text{C}_1^4$ ), 132.1 (s,  $\text{C}_0^4$ ), 129.1 (s,  $\text{C}^4$ ), 128.2 (s,  $\text{C}_1^3$ ), 128.3 (s,  $\text{C}_0^3$ ), 121.7 (d,  $^3J_{\text{CP}} = 3.9$  Hz,  $\text{C}_1^2$ ), 121.4 (bs,  $\text{C}_0^2$ ), 121.2 (d,  $^3J_{\text{CP}} = 4.3$  Hz,  $\text{C}^3$ ), 53.4 (s,  $\text{C}^6$ ), 49.2 (s,  $\text{C}^7$ ), 33.3 – 32.8 (m,  $\text{CH}_3\text{-N-P}_{1,2}$ ), 32.2 (s,  $\text{C}^8$ ), 20.4 (s,  $\text{C}^9$ ), 14.0 (s,  $\text{C}^{10}$ ). Anal. Calcd for  $\text{C}_{408}\text{H}_{528}\text{N}_{63}\text{O}_{42}\text{P}_{21}\text{S}_{18}$  (8214.57): C, 59.65; H, 6.48; N, 10.74. Found: C, 59.66; H, 6.48; N, 10.79.

**A-G3** was obtained in a 65 % yield (2 steps).

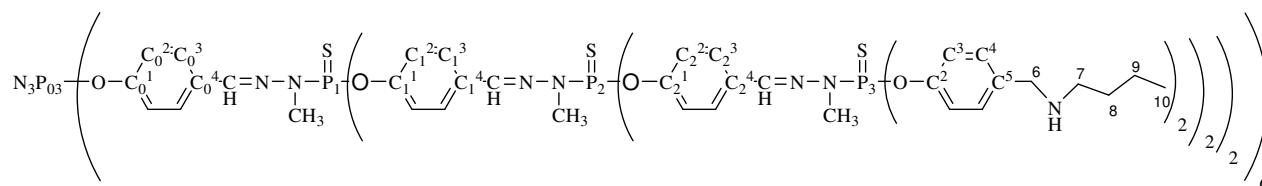

$^{31}\text{P}$  { $^1\text{H}$ } NMR (121 MHz,  $\text{CDCl}_3$ )  $\delta$  62.71 (s,  $\text{P}_3$ ), 62.45 (bs,  $\text{P}_{1,2}$ ), 8.20 (bs,  $\text{P}_0$ ).  $^1\text{H}$  NMR (300 MHz,  $\text{CDCl}_3$ )  $\delta$  7.80 – 7.45 (m, 126H, H- $\text{C}_0^3$ , H- $\text{C}_1^3$ , H- $\text{C}_2^3$ , CH=N-N- $\text{P}_{1,2,3}$ ), 7.40 – 6.99 (m, 276H, H- $\text{C}_0^2$ , H- $\text{C}_1^2$ , H- $\text{C}_2^2$ , H- $\text{C}^3$ , H- $\text{C}^4$ ), 3.70 (bs, 96H,  $\text{C}^6\text{H}_2\text{-N}$ ), 3.50 – 3.10 (m, 126H,  $\text{CH}_3\text{-N-}$   $\text{P}_{1,2,3}$ ), 2.57 (bs, 96H, N- $\text{C}^7\text{H}_2$ ), 1.70 – 1.10 (m, 240H,  $\text{C}^8\text{H}_2$ , NH,  $\text{C}^9\text{H}_2$ ), 0.86 (bs, 144H,  $\text{C}^{10}\text{H}_3$ ).  $^{13}\text{C}$  { $^1\text{H}$ } NMR (75 MHz,  $\text{CDCl}_3$ )  $\delta$  151.2 (m,  $\text{C}_0^1$ ,  $\text{C}_1^1$ ,  $\text{C}_2^1$ ), 149.4 (m,  $\text{C}^2$ ), 139.0 (d,  $^3J_{\text{CP}} = 12.5$  Hz, CH=N-N- $\text{P}_1$ ), 138.4 (d,  $^3J_{\text{CP}} = 13.1$  Hz, CH=N-N- $\text{P}_{2,3}$ ), 137.8 (s,  $\text{C}^5$ ), 132.4 (bs,  $\text{C}_0^4$ ,  $\text{C}_1^4$ ,  $\text{C}_2^4$ ), 129.1 (bs,  $\text{C}^4$ ), 128.2 (bs,  $\text{C}_0^3$ ,  $\text{C}_1^3$ ,  $\text{C}_2^3$ ), 121.8 (bs,  $\text{C}_1^2$ ,  $\text{C}_2^2$ ), 121.3 (s,  $\text{C}^3$ ), 120.9 (s,  $\text{C}_0^2$ ), 53.4 (bs,  $\text{C}^6$ ), 49.2 (bs,  $\text{C}^7$ ), 33.0 (d,  $^2J_{\text{CP}} = 12.6$  Hz,  $\text{CH}_3\text{-N-}$   $\text{P}_{1,2,3}$ ), 32.2 (s,  $\text{C}^8$ ), 20.4 (s,  $\text{C}^9$ ), 14.0 (s,  $\text{C}^{10}$ ). Anal. Calcd for  $\text{C}_{865}\text{H}_{1108}\text{N}_{135}\text{O}_{90}\text{P}_{45}\text{S}_{42}$  (17577.45): C, 59.11; H, 6.35; N, 10.76. Found: C, 59.15; H, 6.34; N, 10.37.

### 3. General procedure for the synthesis of the dendritic phosphoramidite ligands Gn.

A solution of (*S*)-BINOL-derived chlorophosphite<sup>1</sup> (10 mL, 0.1M) was added dropwise to a solution of the amine-capped dendrimer **A-G1** (0.24 g, 0.07 mmol) and *N*-methylnmorpholine (NMM) (0.18 mL, 1.64 mmol) in 5 mL of dry THF at 0 °C. The reaction mixture was allowed to warm to room temperature and was stirred for 24 hours. The precipitate of NMM.HCl was filtered through cannula. After the solvent was removed under reduced pressure, the residue was redissolved in dichloromethane and precipitated in pentane. The resulting solid was then filtered and washed first with pentane:Et<sub>2</sub>O 1:1, then with Et<sub>2</sub>O and finally with MeOH, affording a colorless powder.

<sup>1</sup> H. Bernsmann, M. van den Berg, R. Hoen, A. J. Minnaard, G. Mehler, M. T. Reetz, J. G. De Vries and B. L. Feringa, *J. Org. Chem.*, **2005**, *70*, 943.

**G1** was obtained in a 78 % yield.

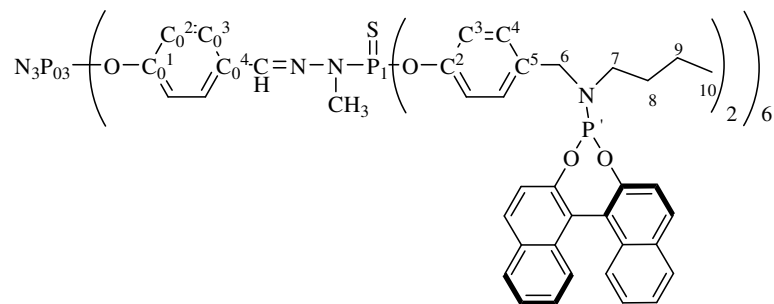

$^{31}\text{P}$   $\{^1\text{H}\}$  NMR (121 MHz,  $\text{CDCl}_3$ )  $\delta$  146.74 (s,  $\text{P}'$ ), 62.85 (s,  $\text{P}_1$ ), 8.25 (s,  $\text{P}_0$ ).  $^1\text{H}$  NMR (300 MHz,  $\text{CDCl}_3$ )  $\delta$  7.99 – 7.72 (m, 48H,  $\text{H-C}_{\text{Binaphth.}}$ ), 7.62 – 6.29 (m, 174H,  $\text{H-C}_0^3$ ,  $\text{CH=N-N-P}_1$ ,  $\text{H-C}^4$ ,  $\text{H-C}^3$ ,  $\text{H-C}_0^2$ ,  $\text{H-C}_{\text{Binaphth.}}$ ), 4.20 – 3.96 (m, 12H,  $\text{C}^6\text{H}_2\text{-N}$ ), 3.56 (b abs, 12H,  $\text{C}^6\text{H}_2\text{-N}$ ), 3.05 – 3.30 (m, 18H,  $\text{CH}_3\text{-N-P}_1$ ), 2.89 (b abs, 12H,  $\text{N-C}^7\text{H}_2$ ), 2.56 (b abs, 12H,  $\text{N-C}^7\text{H}_2$ ), 1.40 (b abs, 24H,  $\text{C}^8\text{H}_2$ ), 1.28 – 1.05 (m, 24H,  $\text{C}^9\text{H}_2$ ), 0.87 – 0.67 (m, 36H,  $\text{C}^{10}\text{H}_3$ ).  $^{13}\text{C}$   $\{^1\text{H}\}$  NMR (62.5 MHz,  $\text{CDCl}_3$ )  $\delta$  149.7 (m,  $\text{C}_0^1$ ,  $\text{C}^2$ ,  $\text{C}_q$  Binaphth.), 149.3 (s,  $\text{C}_q$  Binaphth.), 135.4 (bs,  $\text{CH=N-N-P}_1$ ,  $\text{C}^5$ ), 132.7 (s,  $\text{C}_q$  Binaphth.), 132.5 (s,  $\text{C}_q$  Binaphth.), 132.1 (s,  $\text{C}_0^4$ ), 131.3 (s,  $\text{C}_q$  Binaphth.), 130.6 (s,  $\text{C}_q$  Binaphth.), 130.2 (s,  $\text{CH}_{\text{Binaphth.}}$ ), 130.0 (s,  $\text{CH}_{\text{Binaphth.}}$ ), 129.5 (s,  $\text{C}^4$ ), 128.3 (s,  $\text{CH}_{\text{Binaphth.}}$ ), 128.2 (s,  $\text{C}_0^3$ ,  $\text{CH}_{\text{Binaphth.}}$ ), 126.9 (s,  $\text{CH}_{\text{Binaphth.}}$ ), 126.8 (bs,  $\text{CH}_{\text{Binaphth.}}$ ), 126.1 (s,  $\text{CH}_{\text{Binaphth.}}$ ), 124.8 (s,  $\text{CH}_{\text{Binaphth.}}$ ), 124.6 (s,  $\text{CH}_{\text{Binaphth.}}$ ), 123.9 (d,  $^3J_{\text{CP}} = 4.4$  Hz,  $\text{C}_q$  Binaphth.), 122.5 (s,  $\text{C}_q$  Binaphth.), 122.1 (s,  $\text{CH}_{\text{Binaphth.}}$ ), 121.6 (s,  $\text{CH}_{\text{Binaphth.}}$ ), 121.1 (bs,  $\text{C}_0^2$ ,  $\text{C}^3$ ), 47.6 – 46.8 (m,  $\text{C}^6$ ), 44.9 – 43.9 (m,  $\text{C}^7$ ), 33.3 – 32.5 (m,  $\text{CH}_3\text{-N-P}_1$ ), 30.3 (s,  $\text{C}^8$ ), 19.8 (s,  $\text{C}^9$ ), 13.7 (s,  $\text{C}^{10}$ ). Anal. Calcd for  $\text{C}_{420}\text{H}_{372}\text{N}_{27}\text{O}_{42}\text{P}_2\text{S}_6$  (7312.44): C, 68.99; H, 5.13; N, 5.17. Found: C, 69.01; H, 5.17; N, 5.20.  $[\alpha]_D^{20} +222.69$  ( $c$  0.52, THF).

**G2** was obtained in a 60 % yield.

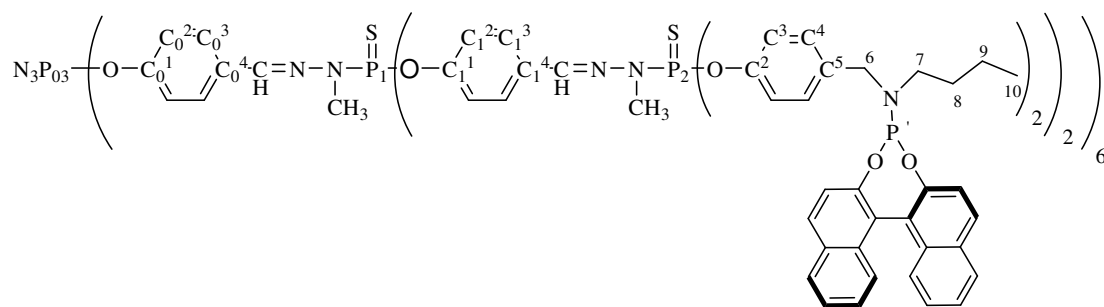

$^{31}\text{P}$   $\{^1\text{H}\}$  NMR (121 MHz,  $\text{CDCl}_3$ )  $\delta$  146.74 (s,  $\text{P}'$ ), 62.94 (s,  $\text{P}_2$ ), 62.43 (s,  $\text{P}_1$ ), 8.31 (s,  $\text{P}_0$ ).  $^1\text{H}$  NMR (300 MHz,  $\text{CDCl}_3$ )  $\delta$  7.98 – 7.71 (m, 102H,  $\text{H-C}_{\text{Binaphth.}}$ ), 7.70 – 6.78 (m, 372H,  $\text{H-C}_0^3$ ,  $\text{H-C}_1^3$ ,  $\text{CH=N-N-P}_{1,2}$ ,  $\text{H-C}^4$ ,  $\text{H-C}^3$ ,  $\text{H-C}_0^2$ ,  $\text{H-C}_1^2$ ,  $\text{H-C}_{\text{Binaphth.}}$ ), 4.06 (b abs, 24H,  $\text{C}^6\text{H}_2\text{-N}$ ), 3.58 (b abs, 24H,  $\text{C}^6\text{H}_2\text{-N}$ ), 3.16 (b abs, 54H,  $\text{CH}_3\text{-N-P}_{1,2}$ ), 2.88 (b abs, 24H,  $\text{N-C}^7\text{H}_2$ ), 2.55 (b abs, 24H,  $\text{N-C}^7\text{H}_2$ ), 1.40 (b abs, 48H,  $\text{C}^8\text{H}_2$ ), 1.15 (b abs, 48H,  $\text{C}^9\text{H}_2$ ), 0.76 (b abs, 72H,  $\text{C}^{10}\text{H}_3$ ).  $^{13}\text{C}$   $\{^1\text{H}\}$  NMR (75 MHz,  $\text{CDCl}_3$ )  $\delta$  151.2 (d,  $^2J_{\text{CP}} =$

7.2 Hz, C<sub>0</sub><sup>1</sup>, C<sub>1</sub><sup>1</sup>), 149.6 (m, C<sup>2</sup>, C<sub>q</sub> Binaphth.), 149.3 (s, C<sub>q</sub> Binaphth.), 138.5 – 138.3 (m, CH=N-N-P<sub>1,2</sub>), 135.4 (s, C<sup>5</sup>), 132.7 (s, C<sub>q</sub> Binaphth.), 132.6 – 131.8 (m, C<sub>0</sub><sup>4</sup>, C<sub>1</sub><sup>4</sup>), 131.3 (s, C<sub>q</sub> Binaphth.), 130.6 (s, C<sub>q</sub> Binaphth.), 130.3 (s, CH Binaphth.), 130.1 (s, CH Binaphth.), 129.5 (s, C<sup>4</sup>), 128.3 (s, CH Binaphth.), 128.2 (s, C<sub>0</sub><sup>3</sup>, C<sub>1</sub><sup>3</sup>, CH Binaphth.), 126.9 (s, CH Binaphth.), 126.8 (s, CH Binaphth.), 126.1 (s, CH Binaphth.), 124.8 (s, CH Binaphth.), 124.6 (s, CH Binaphth.), 123.9 (d, <sup>3</sup>J<sub>CP</sub> = 4.8 Hz, C<sub>q</sub> Binaphth.), 122.6 (s, C<sub>q</sub> Binaphth.), 122.1 (s, CH Binaphth.), 121.9 – 121.4 (m, CH Binaphth., C<sub>0</sub><sup>2</sup>, C<sub>1</sub><sup>2</sup>, C<sup>3</sup>), 47.2 (d, <sup>2</sup>J<sub>CP</sub> = 12.6 Hz, C<sup>6</sup>), 44.4 (d, <sup>2</sup>J<sub>CP</sub> = 28.1 Hz, C<sup>7</sup>), 32.9 (d, <sup>2</sup>J<sub>CP</sub> = 12.6 Hz, CH<sub>3</sub>-N-P<sub>1,2</sub>), 30.3 (s, C<sup>8</sup>), 19.8 (s, C<sup>9</sup>), 13.7 (s, C<sup>10</sup>). Anal. Calcd for C<sub>888</sub>H<sub>792</sub>N<sub>63</sub>O<sub>90</sub>P<sub>45</sub>S<sub>18</sub> (15757.15): C, 67.69; H, 5.07; N, 5.60. Found: C, 67.71; H, 5.05; N, 5.64. [α]<sup>20</sup><sub>D</sub> +230.57 (c 0.53, THF).

**G3** was obtained in an 88 % yield.

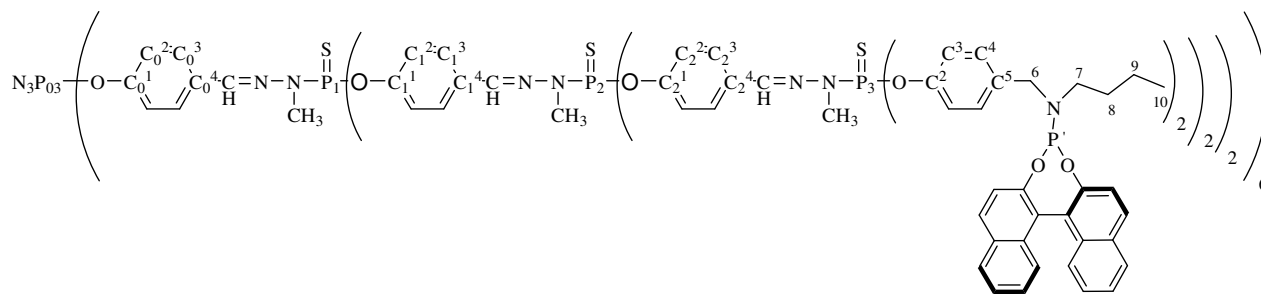

<sup>31</sup>P {<sup>1</sup>H} NMR (121 MHz, CDCl<sub>3</sub>) δ 146.76 (s, P'), 62.84 (s, P<sub>3</sub>), 62.43 (bs, P<sub>1,2</sub>), 8.10 (bs, P<sub>0</sub>). <sup>1</sup>H NMR (400 MHz, CDCl<sub>3</sub>) δ 8.01 – 7.44 (m, 396H, H-C<sub>Binaphth.</sub>, H-C<sub>0</sub><sup>3</sup>, H-C<sub>1</sub><sup>3</sup>, H-C<sub>2</sub><sup>3</sup>, CH=N-N-P<sub>1,2,3</sub>), 7.40 – 7.07 (m, 582H, H-C<sub>Binaphth.</sub>, H-C<sub>0</sub><sup>2</sup>, H-C<sub>1</sub><sup>2</sup>, H-C<sub>2</sub><sup>2</sup>, H-C<sup>3</sup>, H-C<sup>4</sup>), 4.10 (b abs, 48H, C<sup>6</sup>H<sub>2</sub>-N), 3.59 (b abs, 48H, C<sup>6</sup>H<sub>2</sub>-N), 3.19 (b abs, 126H, CH<sub>3</sub>-N-P<sub>1,2,3</sub>), 2.89 (b abs, 48H, N-C<sup>7</sup>H<sub>2</sub>), 2.56 (b abs, 48H, N-C<sup>7</sup>H<sub>2</sub>), 1.40 (b abs, 96H, C<sup>8</sup>H<sub>2</sub>), 1.26 – 1.02 (m, 96H, C<sup>9</sup>H<sub>2</sub>), 0.77 (b abs, 144H, C<sup>10</sup>H<sub>3</sub>). <sup>13</sup>C {<sup>1</sup>H} NMR (100 MHz, CDCl<sub>3</sub>) δ 151.3 (d, <sup>2</sup>J<sub>CP</sub> = 7.0 Hz, C<sub>0</sub><sup>1</sup>, C<sub>1</sub><sup>1</sup>, C<sub>2</sub><sup>1</sup>), 149.8 – 149.5 (m, C<sup>2</sup>, C<sub>q</sub> Binaphth.), 149.3 (s, C<sub>q</sub> Binaphth.), 139.3 – 138.2 (m, CH=N-N-P<sub>1,2,3</sub>), 135.3 (s, C<sup>5</sup>), 132.7 (s, C<sub>q</sub> Binaphth.), 132.5 (s, C<sub>2</sub><sup>4</sup>), 132.4 – 131.9 (m, C<sub>0</sub><sup>4</sup>, C<sub>1</sub><sup>4</sup>), 131.3 (s, C<sub>q</sub> Binaphth.), 130.6 (s, C<sub>q</sub> Binaphth.), 130.3 (s, CH Binaphth.), 130.1 (s, CH Binaphth.), 129.5 (s, C<sup>4</sup>), 128.3 (s, CH Binaphth.), 128.2 (s, CH Binaphth.), 126.9 (s, CH Binaphth.), 126.8 (s, CH Binaphth.), 126.1 (s, CH Binaphth.), 124.8 (s, CH Binaphth.), 124.6 (s, CH Binaphth.), 123.9 (d, <sup>3</sup>J<sub>CP</sub> = 4.5 Hz, C<sub>q</sub> Binaphth.), 122.6 (s, C<sub>q</sub> Binaphth.), 122.1 (s, CH Binaphth.), 121.9 – 121.4 (m, CH Binaphth., C<sub>0</sub><sup>2</sup>, C<sub>1</sub><sup>2</sup>, C<sub>2</sub><sup>2</sup>), 121.2 (s, C<sup>3</sup>), 47.3 (d, <sup>2</sup>J<sub>CP</sub> = 10.9 Hz, C<sup>6</sup>), 44.4 (d, <sup>2</sup>J<sub>CP</sub> = 27.4 Hz, C<sup>7</sup>), 32.9 (d, <sup>2</sup>J<sub>CP</sub> = 12.3 Hz, CH<sub>3</sub>-N-P<sub>1,2,3</sub>), 30.3 (s, C<sup>8</sup>), 19.8 (s, C<sup>9</sup>), 13.8 (s, C<sup>10</sup>). Anal. Calcd for C<sub>1824</sub>H<sub>1632</sub>N<sub>135</sub>O<sub>186</sub>P<sub>93</sub>S<sub>42</sub> (32646.56): C, 67.11; H, 5.04; N, 5.79. Found: C, 67.14; H, 5.07; N, 5.75. [α]<sup>20</sup><sub>D</sub> +242.77 (c 0.51, THF).

#### 4. Full representation of dendrimer G3.

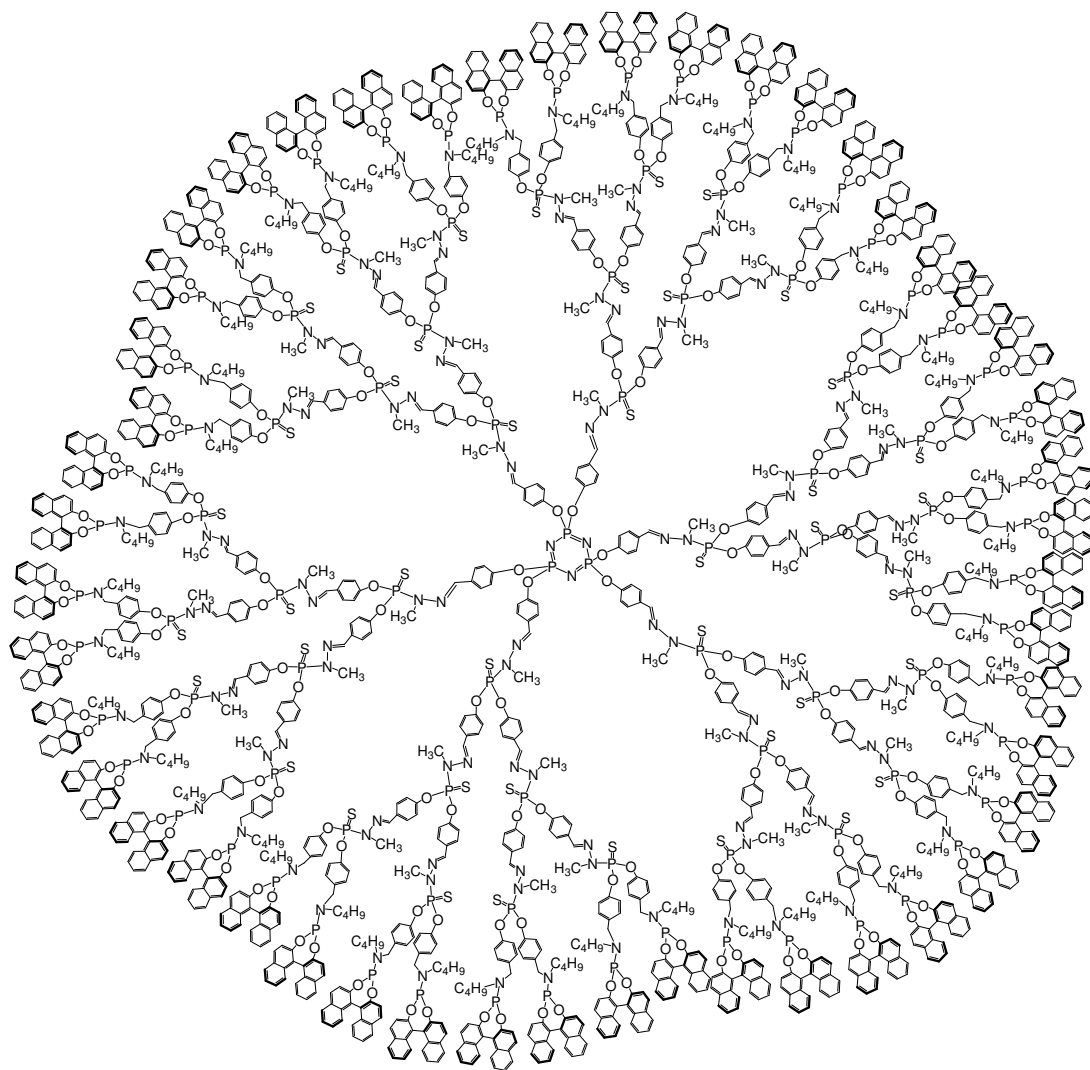

## 5. Synthesis of the monomeric phosphoramidite ligand **M** and characterization data.

A solution of (*S*)-BINOL-derived chlorophosphite (11 mL, 0.1M) was added dropwise to a solution of *N*-(4-methoxybenzyl)-1-butanamine (0.20 g, 1.03 mmol) and *N*-methylmorpholine (NMM) (0.56 mL, 5.17 mmol) in 5 mL of dry THF at 0 °C. The reaction mixture was allowed to warm to room temperature and was stirred for 24 hours. The precipitate of NMM.HCl was filtered through cannula. After the solvent was removed under reduced pressure, the residue was purified by flash chromatography to give **M** (0.47 g, 89 % yield) as a colorless foam.

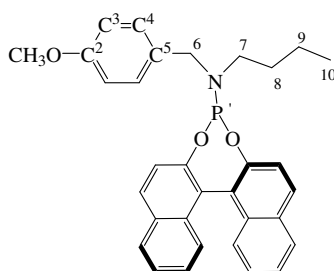

$^{31}\text{P}$  { $^1\text{H}$ } NMR (121 MHz,  $\text{CDCl}_3$ )  $\delta$  147.16 (s,  $\text{P}'$ ).  $^1\text{H}$  NMR (300 MHz,  $\text{CDCl}_3$ )  $\delta$  8.05 – 7.84 (m, 4H,  $\text{H-C}_{\text{Binaph.}}$ ), 7.59 (d,  $^3J_{\text{HH}} = 8.7$  Hz, 1H,  $\text{H-C}_{\text{Binaph.}}$ ), 7.48 – 7.32 (m, 5H,  $\text{H-C}_{\text{Binaph.}}$ ), 7.31 – 7.23 (m, 2H,  $\text{H-C}_{\text{Binaph.}}$ ), 7.22 (d,  $^3J_{\text{HH}} = 8.7$  Hz, 2H,  $\text{H-C}^4$ ), 6.88 (d,  $^3J_{\text{HH}} = 8.7$  Hz, 2H,  $\text{H-C}^3$ ), 4.17 (dd,  $^2J_{\text{HH}} = 14.9$  Hz,  $^3J_{\text{HP}} = 6.6$  Hz, 1H,  $\text{C}^6\text{H}_2\text{-N}$ ), 3.81 (s, 3H,  $\text{CH}_3\text{O}$ ), 3.66 (dd,  $^2J_{\text{HH}} = 14.9$  Hz,  $^3J_{\text{HP}} = 9.1$  Hz, 1H,  $\text{C}^6\text{H}_2\text{-N}$ ), 3.01 – 2.85 (m, 1H,  $\text{N-C}^7\text{H}_2$ ), 2.74 – 2.53 (m, 1H,  $\text{N-C}^7\text{H}_2$ ), 1.55 – 1.42 (m, 2H,  $\text{C}^8\text{H}_2$ ), 1.38 – 1.10 (m, 2H,  $\text{C}^9\text{H}_2$ ), 0.86 (t,  $^3J_{\text{HH}} = 7.3$  Hz, 3H,  $\text{C}^{10}\text{H}_3$ ).  $^{13}\text{C}$  NMR (75 MHz,  $\text{CDCl}_3$ )  $\delta$  158.7 (s,  $\text{C}^2$ ), 149.9 (d,  $^2J_{\text{CP}} = 5.2$  Hz,  $\text{C}_{\text{q Binaph.}}$ ), 149.5 (s,  $\text{C}_{\text{q Binaph.}}$ ), 132.8 (s,  $\text{C}_{\text{q Binaph.}}$ ), 132.6 (s,  $\text{C}_{\text{q Binaph.}}$ ), 131.4 (s,  $\text{C}_{\text{q Binaph.}}$ ), 130.6 (s,  $\text{C}_{\text{q Binaph.}}$ ), 130.2 (s,  $\text{C}^5$ ), 130.1 (s,  $\text{CH}_{\text{Binaph.}}$ ), 129.9 (s,  $\text{CH}_{\text{Binaph.}}$ ), 129.6 (s,  $\text{C}^4$ ), 128.3 (s,  $\text{CH}_{\text{Binaph.}}$ ), 128.2 (s,  $\text{CH}_{\text{Binaph.}}$ ), 127.0 (s,  $\text{CH}_{\text{Binaph.}}$ ), 126.9 (s,  $\text{CH}_{\text{Binaph.}}$ ), 126.0 (s,  $\text{CH}_{\text{Binaph.}}$ ), 125.9 (s,  $\text{CH}_{\text{Binaph.}}$ ), 124.7 (s,  $\text{CH}_{\text{Binaph.}}$ ), 124.5 (s,  $\text{CH}_{\text{Binaph.}}$ ), 124.0 (d,  $^3J_{\text{CP}} = 4.9$  Hz,  $\text{C}_{\text{q Binaph.}}$ ), 122.6 (d,  $^3J_{\text{CP}} = 2.1$  Hz,  $\text{C}_{\text{q Binaph.}}$ ), 122.2 (d,  $^3J_{\text{CP}} = 1.7$  Hz,  $\text{CH}_{\text{Binaph.}}$ ), 121.8 (s,  $\text{CH}_{\text{Binaph.}}$ ), 113.6 (s,  $\text{C}^3$ ), 55.3 (s,  $\text{CH}_3\text{O}$ ), 47.3 (d,  $^2J_{\text{CP}} = 14.3$  Hz,  $\text{C}^6$ ), 44.1 (d,  $^2J_{\text{CP}} = 26.9$  Hz,  $\text{C}^7$ ), 30.3 (d,  $^3J_{\text{CP}} = 2.2$  Hz,  $\text{C}^8$ ), 19.8 (s,  $\text{C}^9$ ), 13.8 (s,  $\text{C}^{10}$ ). Anal. Calcd for  $\text{C}_{32}\text{H}_{30}\text{NO}_3\text{P}$  (507.56): C, 75.72; H, 5.96; N, 2.76. Found: C, 75.69; H, 6.00; N, 2.79.  $[\alpha]_{\text{D}}^{20} +322.26$  ( $c$  0.53, THF).



## 6. Synthesis of the dimeric phosphoramidite branch **B** and characterization data.

### Synthesis of **B**-(CHO)<sub>2</sub>

**B**-(P(S)Cl<sub>2</sub>) [MeOC<sub>6</sub>H<sub>4</sub>CH=N-N(Me)-P(S)Cl<sub>2</sub>]<sup>2</sup> (2.00g, 6.73 mmol) was dissolved in THF, and then 4-hydroxybenzaldehyde (13.6 mmol) and cesium carbonate (13.6 mmol) were added. Reaction mixture was stirred overnight at room temperature, and then centrifuged. The solution was concentrated and the solid obtained was washed few times in pentane/Et<sub>2</sub>O (9:1) mixture. The resulting powder was filtered and dried under vacuum to yield the desired product (2.68g, 85 % yield) as a colorless solid.

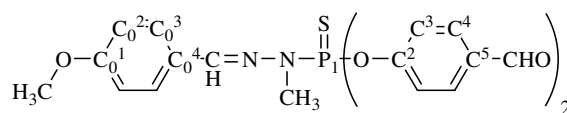

<sup>31</sup>P {<sup>1</sup>H} NMR (121.5 MHz, CDCl<sub>3</sub>) δ 60.60 (s, P). <sup>1</sup>H NMR (300 MHz, CDCl<sub>3</sub>) δ 9.98 (s, 2H, CHO), 7.89 (d, <sup>3</sup>J<sub>HH</sub> = 8.6 Hz, 4H, H-C<sup>4</sup>), 7.63 (m, 3H, H-C<sup>03</sup> and CH=N-N-P), 7.43 (d, <sup>3</sup>J<sub>HH</sub> = 8.6 Hz, 4H, H-C<sup>3</sup>), 6.94 (d, <sup>3</sup>J<sub>HH</sub> = 8.8 Hz, 2H, H-C<sup>02</sup>), 3.85 (s, 3H, CH<sub>3</sub>O), 3.41 (d, <sup>3</sup>J<sub>HP</sub> = 11.1 Hz, 3H, CH<sub>3</sub>-N-P), 2.57 (bs, 4H, N-C<sup>7</sup>H<sub>2</sub>), 1.87 (bs, 2H, NH), 1.45 (bs, 4H, C<sup>8</sup>H<sub>2</sub>), 1.32 (bs, 4H, C<sup>9</sup>H<sub>2</sub>), 0.89 (bs, 6H, C<sup>10</sup>H<sub>3</sub>). <sup>13</sup>C {<sup>1</sup>H} NMR (75 MHz, CDCl<sub>3</sub>) δ 190.77 (s, CHO), 161.03 (s, C<sup>01</sup>), 155.28 (d, <sup>2</sup>J<sub>CP</sub> = 7.3 Hz, C<sup>2</sup>), 140.67 (d, <sup>3</sup>J<sub>CP</sub> = 13.8 Hz, CH=N-N-P), 133.64 (s, C<sup>5</sup>), 131.42 (s, C<sup>4</sup>), 128.52 (s, C<sup>03</sup>), 127.17 (s, C<sup>04</sup>), 121.05 (s, C<sup>3</sup>), 114.28 (s, C<sup>02</sup>), 57.40 (s, CH<sub>3</sub>O), 32.85 (d, <sup>2</sup>J<sub>CP</sub> = 13.7 Hz, CH<sub>3</sub>-N-P). Anal. Calcd for C<sub>23</sub>H<sub>21</sub>N<sub>2</sub>O<sub>3</sub>PS (468.46): C, 58.97; H, 4.52; N, 5.98. Found: C, 59.01; H, 4.50; N, 5.96.

### Synthesis of **B**-(NH)<sub>2</sub>

To an ice-cooled solution of n-butylamine (10.5 mmol) in THF (30 mL) and in the presence of molecular sieves was added **B**-(CHO)<sub>2</sub> (1.52 g, 3.25 mmol). After the addition, the reaction mixture was kept at room temperature for 24 hours and was then filtered through cannula and evaporated

<sup>2</sup> M. Keller, M. Ianchuk, S. Ladeira, M. Taillefer, A.-M. Caminade, J.-P. Majoral, A. Ouali, *Eur. J. Org. Chem.*, **2012**, 1056.

under reduced pressure. After that, the residue was then dissolved in THF:MeOH 1.5:1 (166 mL, 70 mL, 100 mL, respectively) and ice-cooled. Then, NaBH<sub>4</sub> (17.3 mmol) was slowly added and the reaction mixture was led to reach room temperature. After 18 hours, the reaction was quenched by addition of water and concentrated under reduced pressure. The mixture was then diluted in 50 mL of dichloromethane and was washed with sat. NaHCO<sub>3</sub> solution, water and brine (20 mL each), dried over MgSO<sub>4</sub> and filtered. Removal of the solvent under reduced pressure yielded the corresponding product (1.42 g, 75 % yield over two steps) as a colorless oil.

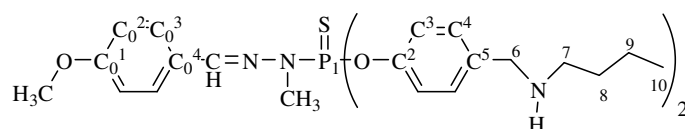

<sup>31</sup>P {<sup>1</sup>H} NMR (121.5 MHz, CDCl<sub>3</sub>) δ 62.86 (s, P). <sup>1</sup>H NMR (300 MHz, CDCl<sub>3</sub>) δ 7.63 (m, 3H, H-C<sub>0</sub><sup>3</sup> and CH=N-N-P), 7.21 (m, 8H, H-C<sup>3</sup> and H-C<sup>4</sup>), 6.90 (bs, 2H, H-C<sub>0</sub><sup>2</sup>), 3.77 (s, 3H, CH<sub>3</sub>O), 3.70 (bs, 4H, C<sup>6</sup>H<sub>2</sub>-N), 3.29 (d, <sup>3</sup>J<sub>HP</sub> = 9.0 Hz, 3H, CH<sub>3</sub>-N-P), 2.57 (bs, 4H, N-C<sup>7</sup>H<sub>2</sub>), 1.87 (bs, 2H, NH), 1.45 (bs, 4H, C<sup>8</sup>H<sub>2</sub>), 1.32 (bs, 4H, C<sup>9</sup>H<sub>2</sub>), 0.89 (bs, 6H, C<sup>10</sup>H<sub>3</sub>). <sup>13</sup>C {<sup>1</sup>H} NMR (75 MHz, CDCl<sub>3</sub>) δ 160.68 (s, C<sub>0</sub><sup>1</sup>), 149.62 (d, <sup>2</sup>J<sub>CP</sub> = 7.2 Hz, C<sup>2</sup>), 139.45 (d, <sup>3</sup>J<sub>CP</sub> = 13.7 Hz, CH=N-N-P), 137.50 (s, C<sup>5</sup>), 129.15 (s, C<sup>4</sup>), 128.45 (s, C<sub>0</sub><sup>3</sup>), 127.73 (s, C<sub>0</sub><sup>4</sup>), 121.34 (d, <sup>3</sup>J<sub>CP</sub> = 4.45 Hz, C<sup>3</sup>), 114.14 (s, C<sub>0</sub><sup>2</sup>), 55.31 (s, CH<sub>3</sub>O), 53.34 (s, C<sup>6</sup>), 49.14 (s, C<sup>7</sup>), 33.0 (d, <sup>2</sup>J<sub>CP</sub> = 13.0 Hz, CH<sub>3</sub>-N-P), 32.12 (s, C<sup>8</sup>), 20.46 (s, C<sup>9</sup>), 14.05 (s, C<sup>10</sup>). Anal. Calcd for C<sub>31</sub>H<sub>43</sub>N<sub>4</sub>O<sub>3</sub>PS (582.74): C, 63.89; H, 7.44; N, 9.61. Found: C, 63.62; H, 7.89; N, 9.73.

### Synthesis of **B**

A solution of (*S*)-BINOL-derived chlorophosphite (23 mL, 0.1M) was added dropwise to a solution of **B**-(NH)<sub>2</sub> (1.23 g, 2.11 mmol) and *N*-methylmorpholine (NMM) (0.56 mL, 5.17 mmol) in 15 mL of dry THF at 0 °C. The reaction mixture was allowed to warm to room temperature and was stirred for 24 hours. The precipitate of NMM.HCl was filtered through cannula. After the solvent was removed under reduced pressure, the residue was purified by flash chromatography to give **B** (0.80 g, 31 % yield) as a colorless solid.

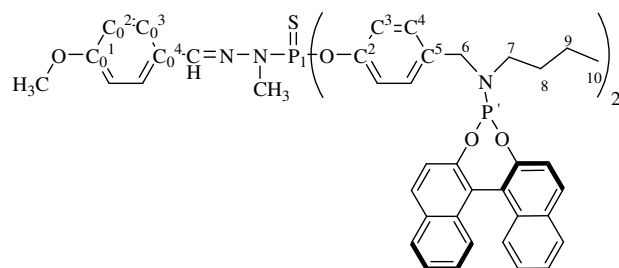

$^{31}\text{P}$  { $^1\text{H}$ } NMR (160 MHz,  $\text{CDCl}_3$ )  $\delta$  146.90 (s,  $\text{P}'$ ), 146.86 (s,  $\text{P}'$ ), 63.03 (s,  $\text{P}_1$ ).  $^1\text{H}$  NMR (400 MHz,  $\text{CDCl}_3$ )  $\delta$  7.96 (d,  $^3J_{\text{HH}} = 8.8$  Hz, 2H, H- $\text{C}_{\text{Binaphth.}}$ ), 7.90 (d,  $^3J_{\text{HH}} = 8.0$  Hz, 2H, H- $\text{C}_{\text{Binaphth.}}$ ), 7.86 – 7.81 (m, 4H, H- $\text{C}_{\text{Binaphth.}}$ ), 7.64 (d,  $^3J_{\text{HH}} = 8.8$  Hz, 2H, H- $\text{C}_0^3$ ), 7.57 (m, 1H, CH=N-N- $\text{P}_1$ ), 7.53 (d,  $^3J_{\text{HH}} = 8.8$  Hz, 2H, H- $\text{C}_{\text{Binaphth.}}$ ), 7.12 – 7.42 (m, 22H, H- $\text{C}^4$ , H- $\text{C}^3$ , H- $\text{C}_{\text{Binaphth.}}$ ), 6.90 (d,  $^3J_{\text{HH}} = 8.8$  Hz, 2H, H- $\text{C}_0^2$ ), 4.07 – 4.14 (m, 2H,  $\text{C}^6\text{H}_2\text{-N}$ ), 3.81 (s, 3H,  $\text{CH}_3\text{O}$ ), 3.56 – 3.64 (m, 2H,  $\text{C}^6\text{H}_2\text{-N}$ ), 3.32 (d,  $^3J_{\text{HP}} = 10.8$  Hz, 3H,  $\text{CH}_3\text{-N-}\text{P}_1$ ), 2.97 – 2.85 (m, 2H, N- $\text{C}^7\text{H}_2$ ), 2.65 – 2.51 (m, 2H, N- $\text{C}^7\text{H}_2$ ), 1.52 – 1.39 (m, 4H,  $\text{C}^8\text{H}_2$ ), 1.23 – 1.08 (m, 2H,  $\text{C}^9\text{H}_2$ ), 0.82 (t,  $^3J_{\text{HH}} = 7.4$  Hz, 6H,  $\text{C}^{10}\text{H}_3$ ).  $^{13}\text{C}$  NMR (100 MHz,  $\text{CDCl}_3$ )  $\delta$  160.7 (s,  $\text{C}_0^1$ ), 149.7 (d,  $^2J_{\text{CP}} = 5.6$  Hz,  $\text{C}^2$ ), 149.3 (s,  $\text{C}_q$  Binaphth.), 139.4 (d,  $^3J_{\text{CP}} = 13.6$  Hz, CH=N-N-P), 135.2 (s,  $\text{C}^5$ ), 132.8 (s,  $\text{C}_q$  Binaphth.), 132.5 (s,  $\text{C}_q$  Binaphth.), 131.3 (s,  $\text{C}_q$  Binaphth.), 130.6 (s,  $\text{C}_q$  Binaphth.), 130.2 (s, CH Binaphth.), 130.0 (s, CH Binaphth.), 129.4 (s,  $\text{C}^4$ ), 128.4 (s,  $\text{C}_0^3$ ), 128.3 (s, CH Binaphth.), 128.2 (s, CH Binaphth.), 127.7 (s,  $\text{C}_0^4$ ), 127.0 (s, CH Binaphth.), 126.9 (s, CH Binaphth.), 126.0 (s, CH Binaphth.), 124.7 (s, CH Binaphth.), 124.5 (s, CH Binaphth.), 124.0 (m,  $\text{C}_q$  Binaphth.), 122.5 (m,  $\text{C}_q$  Binaphth.), 122.1 (s, CH Binaphth.), 121.6 (s, CH Binaphth.), 121.3 (d,  $^3J_{\text{CP}} = 4.7$  Hz,  $\text{C}^3$ ), 114.1 (s,  $\text{C}_0^2$ ), 55.3 (s,  $\text{CH}_3\text{O}$ ), 47.2 (d,  $^2J_{\text{CP}} = 11.7$  Hz,  $\text{C}^6$ ), 44.4 (d,  $^2J_{\text{CP}} = 29.1$  Hz,  $\text{C}^7$ ), 33.0 (d,  $^2J_{\text{CP}} = 13.1$  Hz,  $\text{CH}_3\text{-N-P}$ ), 30.3 (d,  $^3J_{\text{CP}} = 1.9$  Hz,  $\text{C}^8$ ), 19.8 (s,  $\text{C}^9$ ), 13.7 (s,  $\text{C}^{10}$ ).

### 7. Rhodium-catalyzed [2 + 2 + 2] cycloaddition of *N,N*-bis(2-butyne-1-yl)-(4-methylphenyl)sulfonamide **1** with phenylacetylene **2**. General Procedure.

Dendrimer bearing phosphoramidite end groups **Gn** (generation 1: 4.6 mg,  $6.2 \cdot 10^{-4}$  mmol, generation 2: 4.9 mg,  $3.1 \cdot 10^{-4}$  mmol, generation 3: 5.1 mg,  $1.6 \cdot 10^{-4}$  mmol; each case corresponds to 5 mol% end groups) and  $[\text{Rh}(\text{C}_2\text{H}_4)_2\text{Cl}]_2$  (1.2 mg,  $3.7 \cdot 10^{-3}$  mmol) were dissolved in dry toluene (1.0 mL) and the mixture was stirred at room temperature for 30 min. To this solution a toluene (1.0 mL) solution of *N,N*-bis(2-butyne-1-yl)-(4-methylphenyl)sulfonamide (41.3 mg, 0.15 mmol) and phenylacetylene (84  $\mu\text{L}$ , 0.75 mmol) was added dropwise over 10 min at RT. The mixture was stirred at reflux for 2 h. Hexanes (10 mL) was then added to precipitate the dendritic catalyst, which was recovered by filtration and washed twice with hexanes. The precipitated catalyst was dried and kept for a future use following the same procedure without reloading with rhodium. The filtrate and the washing solutions were concentrated together and purified by column chromatography (hexane:AcOEt = 20:1) to afford the corresponding product.

### 8. Rhodium-Catalyzed Enantioselective [2 + 2 + 2] Cycloaddition of *N,N*-bis(2-butyne-1-yl)-(4-methylphenyl)sulfonamide **1** with alkynyl substrate **4**. General Procedure.

Dendrimer bearing phosphoramidite end groups **Gn** (generation 1: 3.0 mg,  $4.2 \cdot 10^{-4}$  mmol, generation 2: 3.3 mg,  $2.1 \cdot 10^{-4}$  mmol, generation 3: 3.4 mg,  $1.0 \cdot 10^{-4}$  mmol; each case corresponding to 5 mol% end groups) and  $[\text{Rh}(\text{C}_2\text{H}_4)_2\text{Cl}]_2$  (1.0 mg,  $2.5 \cdot 10^{-3}$  mmol) were dissolved in dry toluene (0.2 mL) and the mixture was stirred at RT for 30 min. A toluene (0.2 mL) solution of the alkynyl phosphonate or carbonate **4** (31.8 mg, 0.10 mmol) was then added to this and then a toluene (0.6 mL) solution of *N,N*-bis(2-butyne-1-yl)-(4-methylphenyl)sulfonamide **1** (41.3 mg, 0.15 mmol) was added dropwise over 20 min at RT. After stirring at RT for 48 h, 10 mL of hexanes were added to precipitate the dendritic catalyst, which was recovered by filtration and washed twice with hexanes. The precipitated catalyst was dried and kept for a future use following the same procedure without reloading with rhodium. The filtrate and the washing solutions were concentrated together and purified by column chromatography (hexane:AcOEt = 1:1) to afford the corresponding product **5**.

## 9. $^{31}\text{P}$ $\{^1\text{H}\}$ NMR, $^1\text{H}$ NMR and $^{13}\text{C}$ $\{^1\text{H}\}$ NMR spectra of dendrimers A-Gn

### A-G1, $^{31}\text{P}$ $\{^1\text{H}\}$ NMR (121 MHz, $\text{CDCl}_3$ )

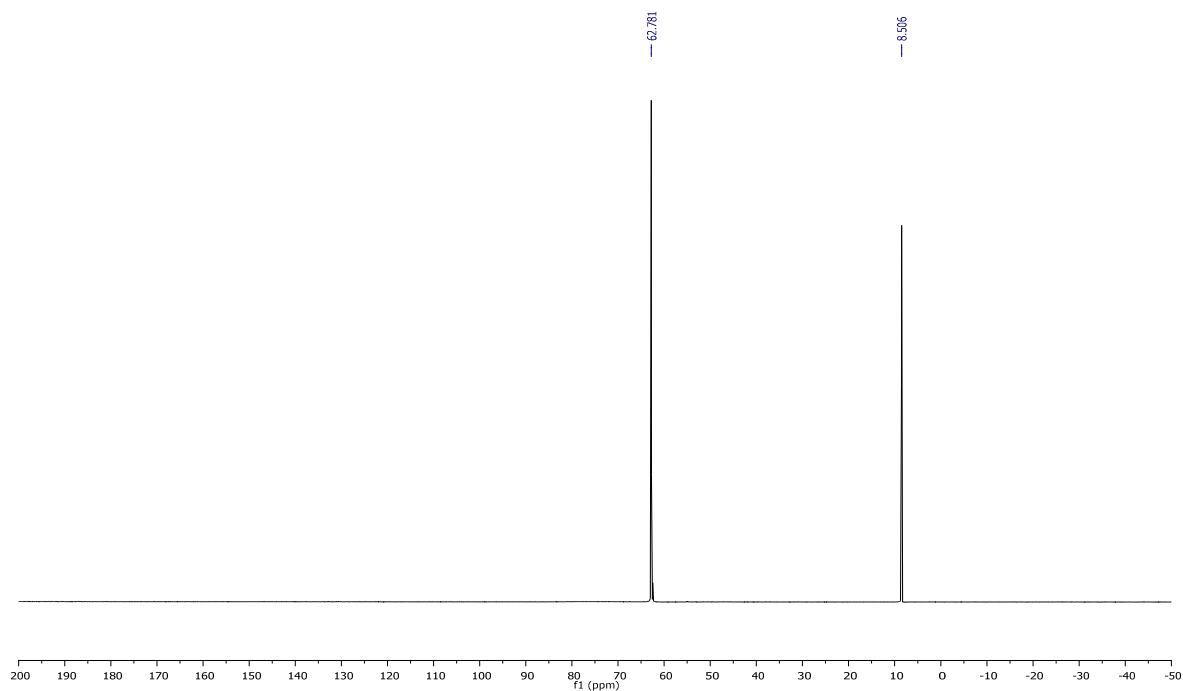

### A-G1, $^1\text{H}$ NMR (250 MHz, $\text{CDCl}_3$ )

hmfA0051  
H1\_INT  
L14G

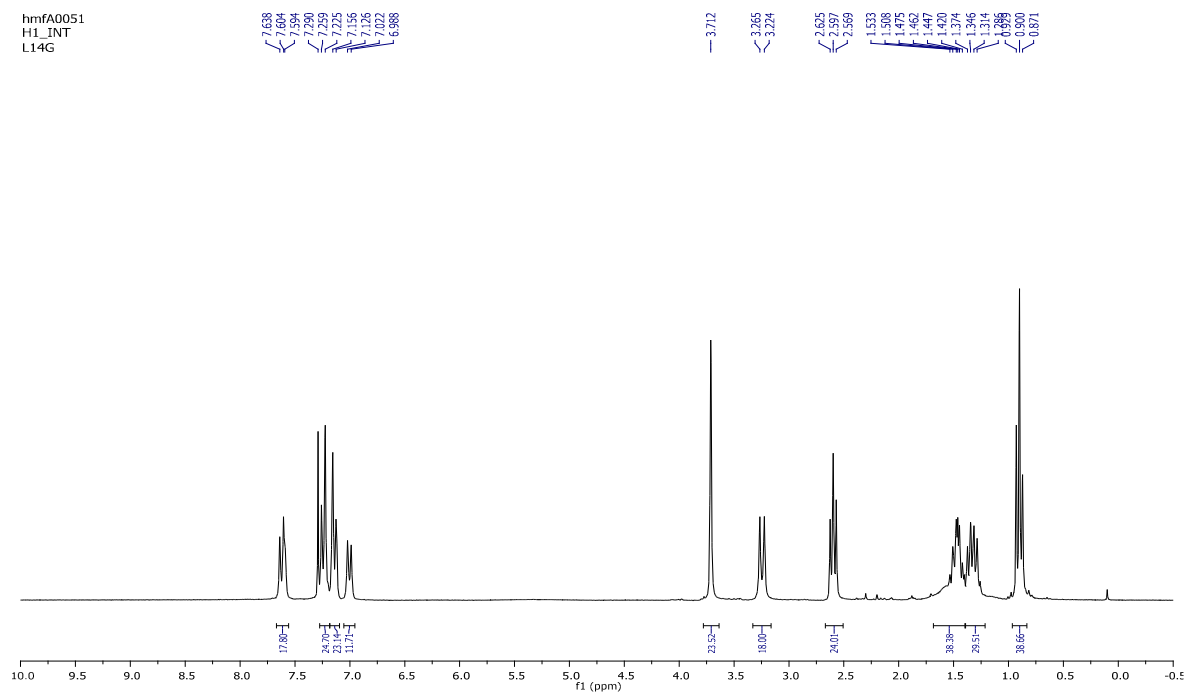

A-G1,  $^{13}\text{C}$  { $^1\text{H}$ } NMR (75 MHz,  $\text{CDCl}_3$ )

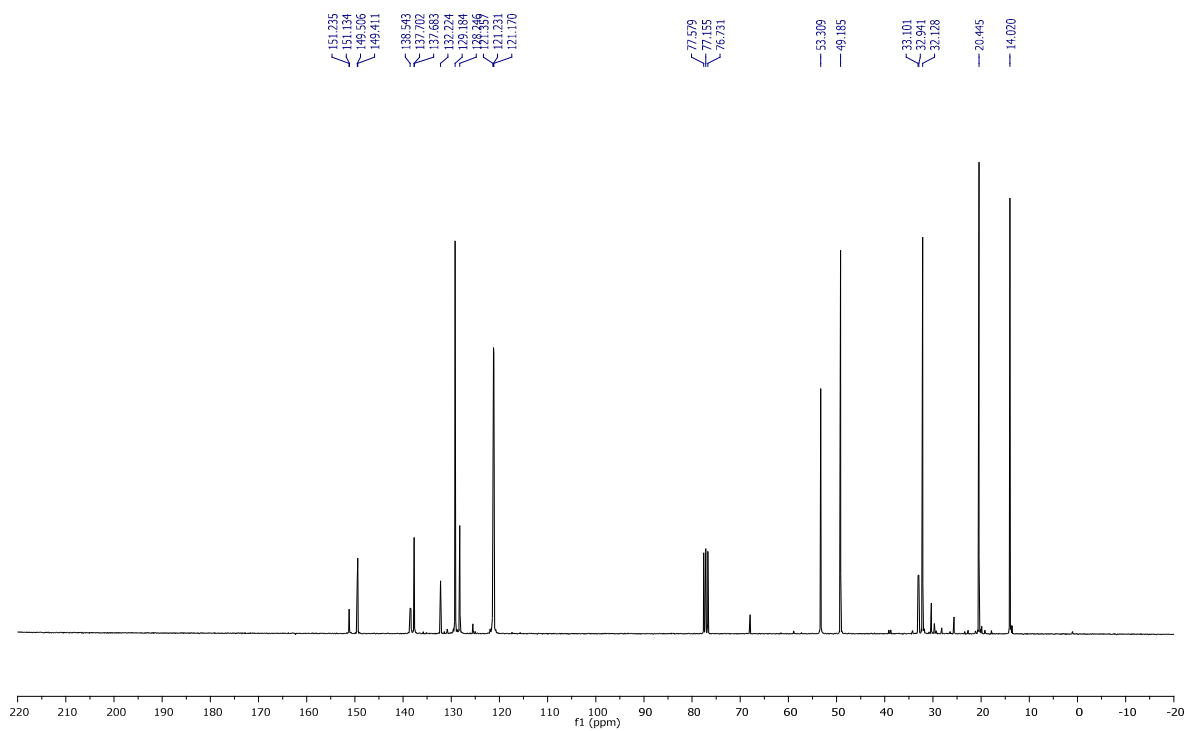

A-G2,  $^{31}\text{P}$  { $^1\text{H}$ } NMR (161 MHz,  $\text{CDCl}_3$ )

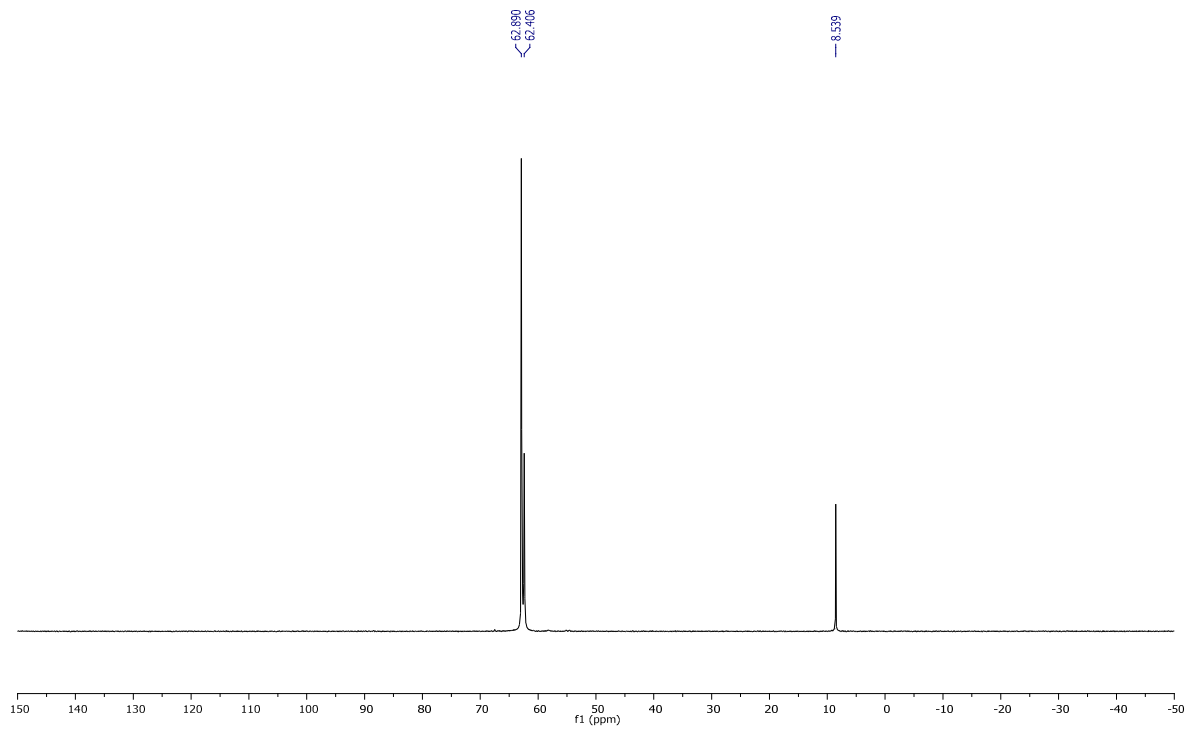

A-G2,  $^1\text{H}$  NMR (400 MHz,  $\text{CDCl}_3$ )

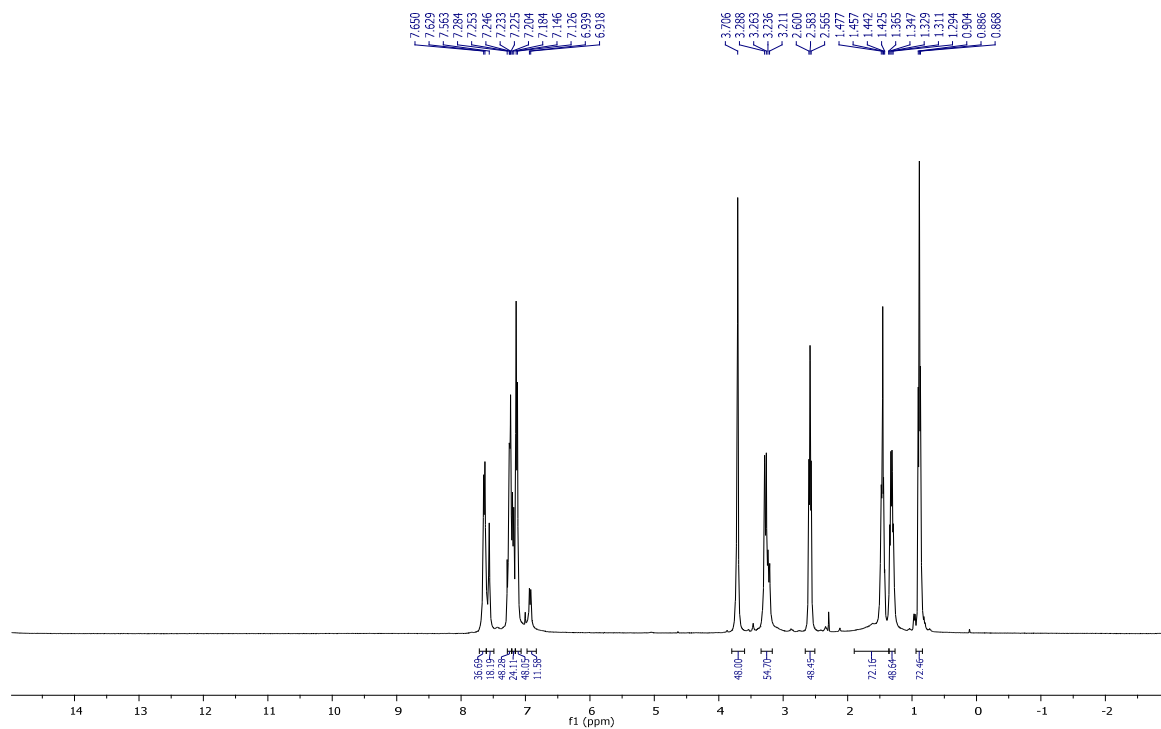

A-G2,  $^{13}\text{C}$  { $^1\text{H}$ } NMR (100 MHz,  $\text{CDCl}_3$ )

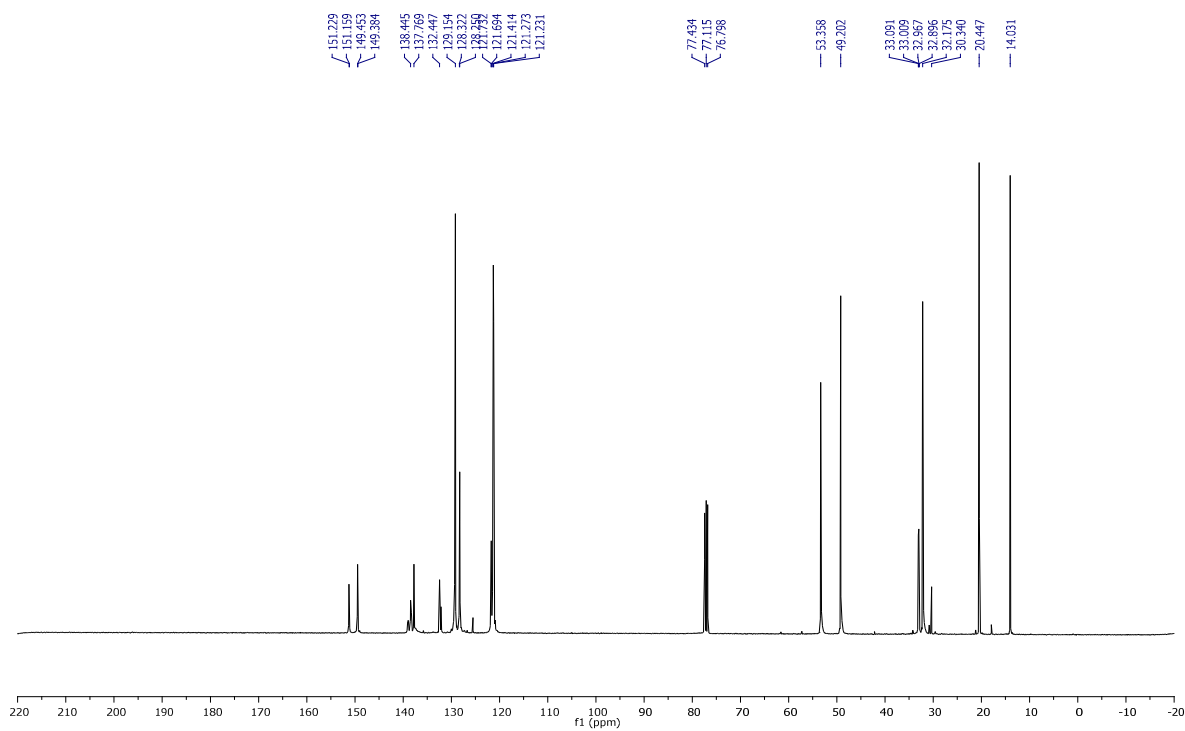

A-G3,  $^{31}\text{P}\{^1\text{H}\}$  NMR (121 MHz,  $\text{CDCl}_3$ )

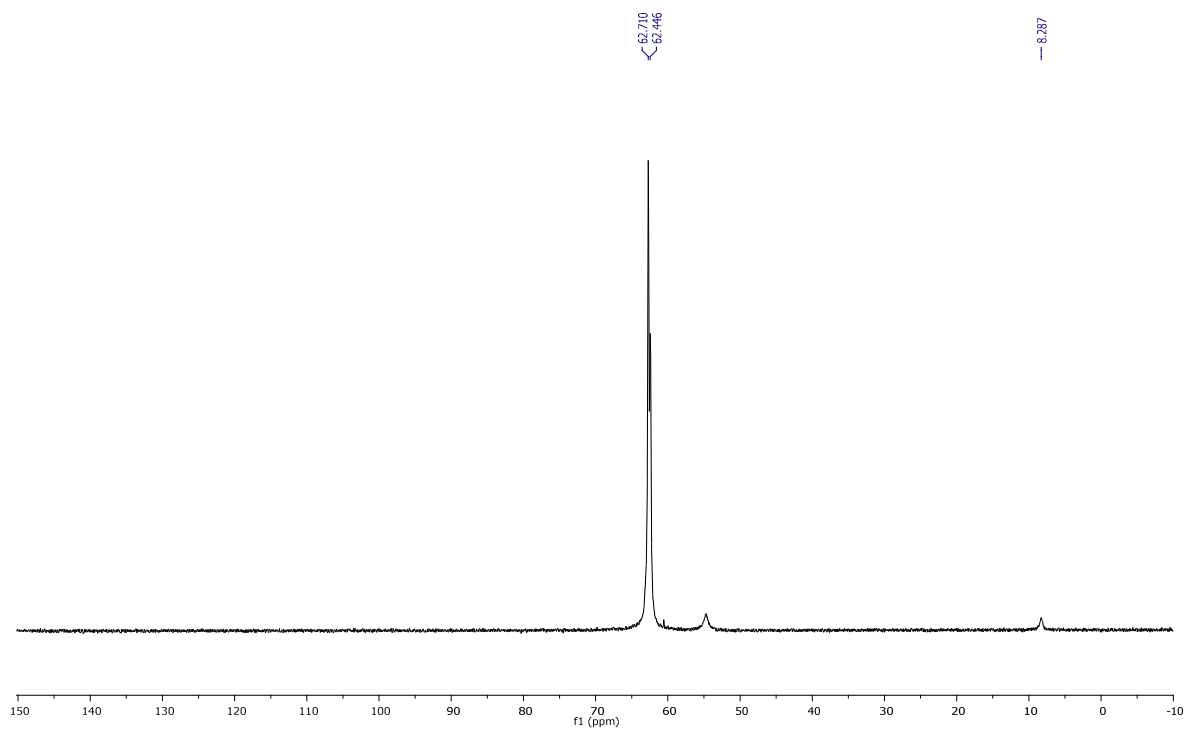

A-G3,  $^1\text{H}$  NMR (300 MHz,  $\text{CDCl}_3$ )

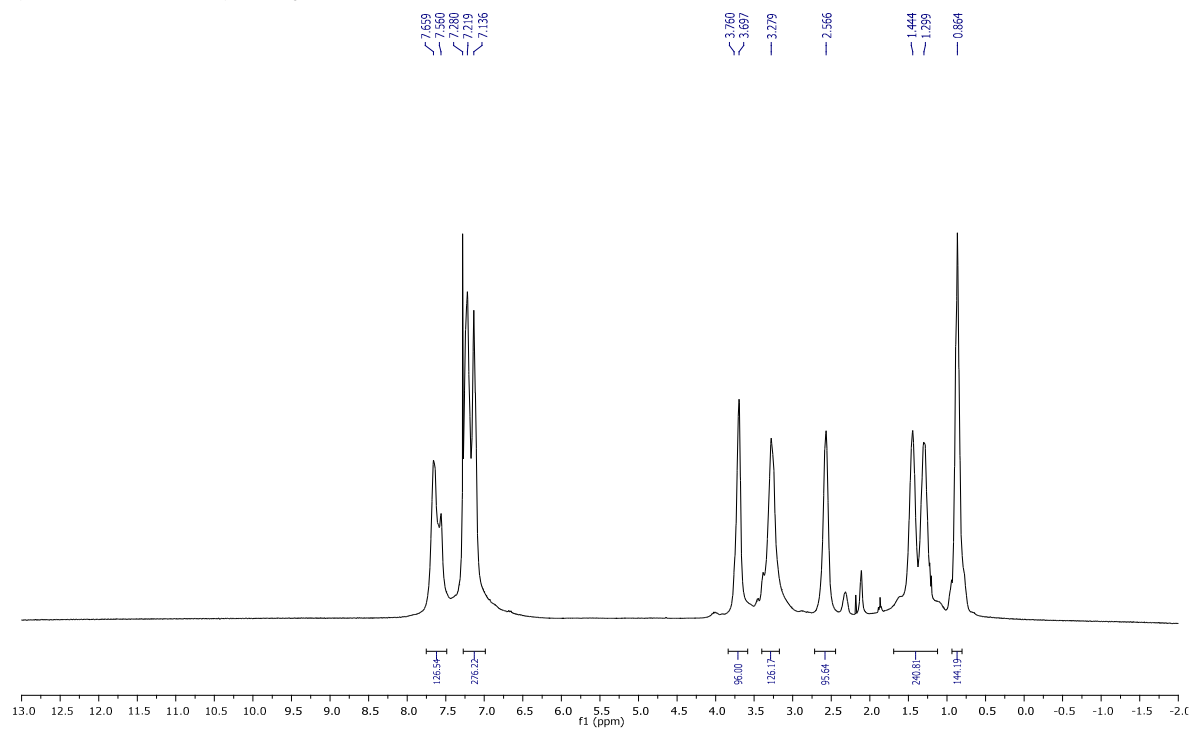



A-G3,  $^{13}\text{C}$  { $^1\text{H}$ } NMR (75 MHz,  $\text{CDCl}_3$ )

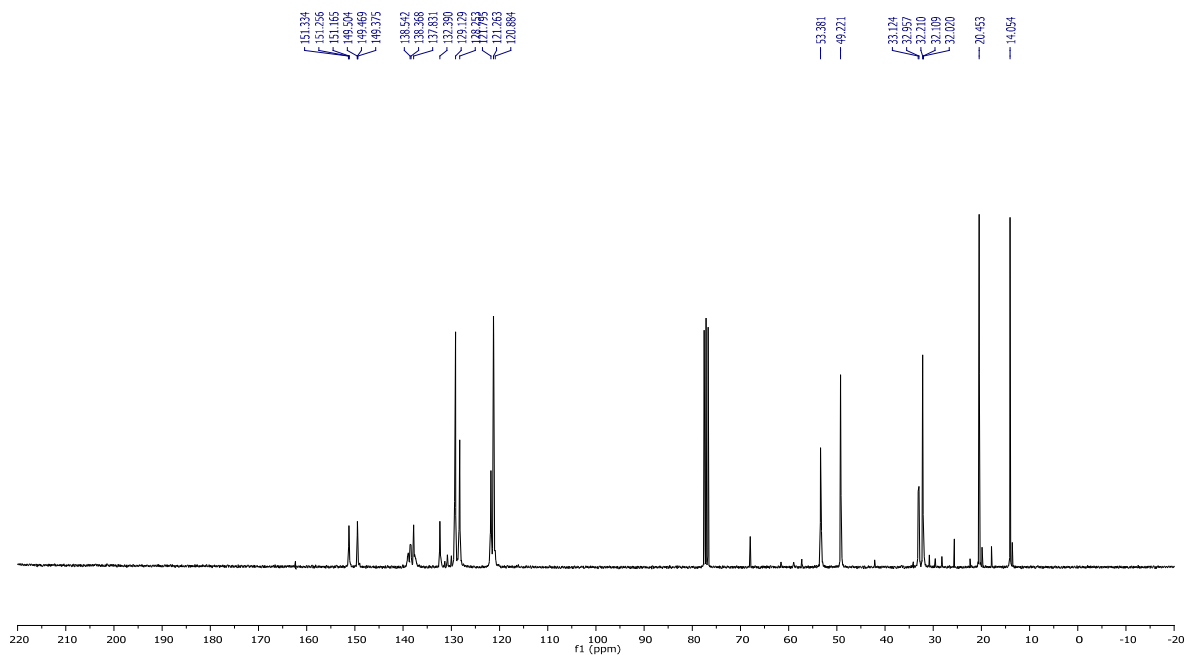

10.  $^{31}\text{P}$  { $^1\text{H}$ } NMR,  $^1\text{H}$  NMR and  $^{13}\text{C}$  { $^1\text{H}$ } NMR spectra of dendrimers Gn

G1,  $^{31}\text{P}$  { $^1\text{H}$ } NMR (121 MHz,  $\text{CDCl}_3$ )

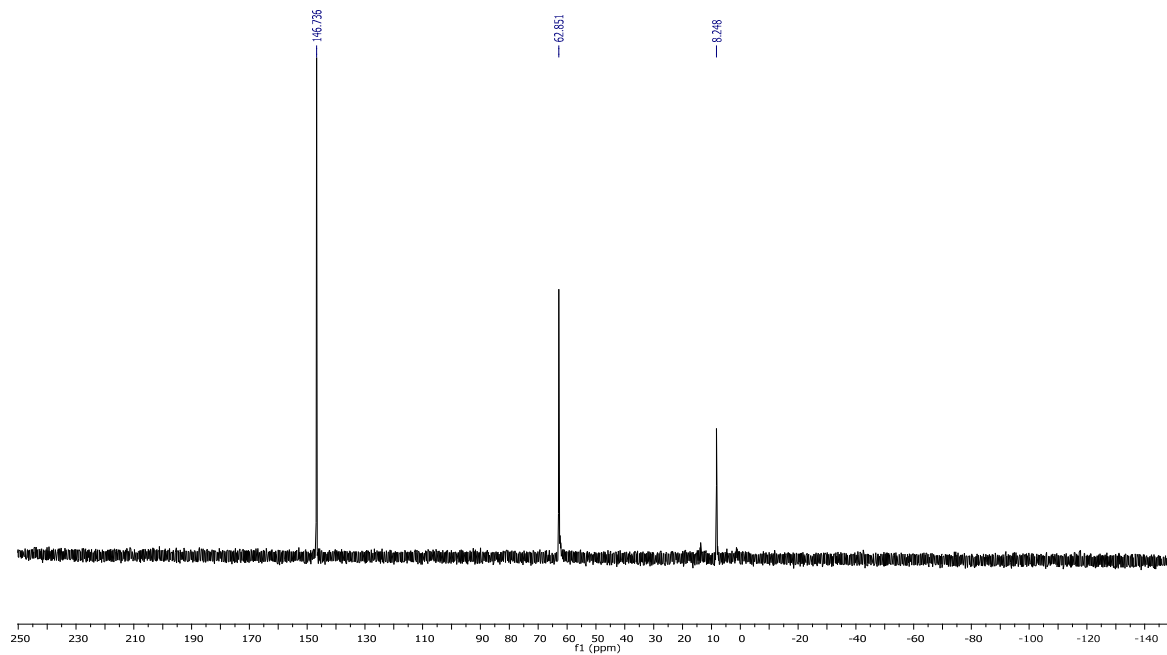

G1,  $^1\text{H}$  NMR (300 MHz,  $\text{CDCl}_3$ )

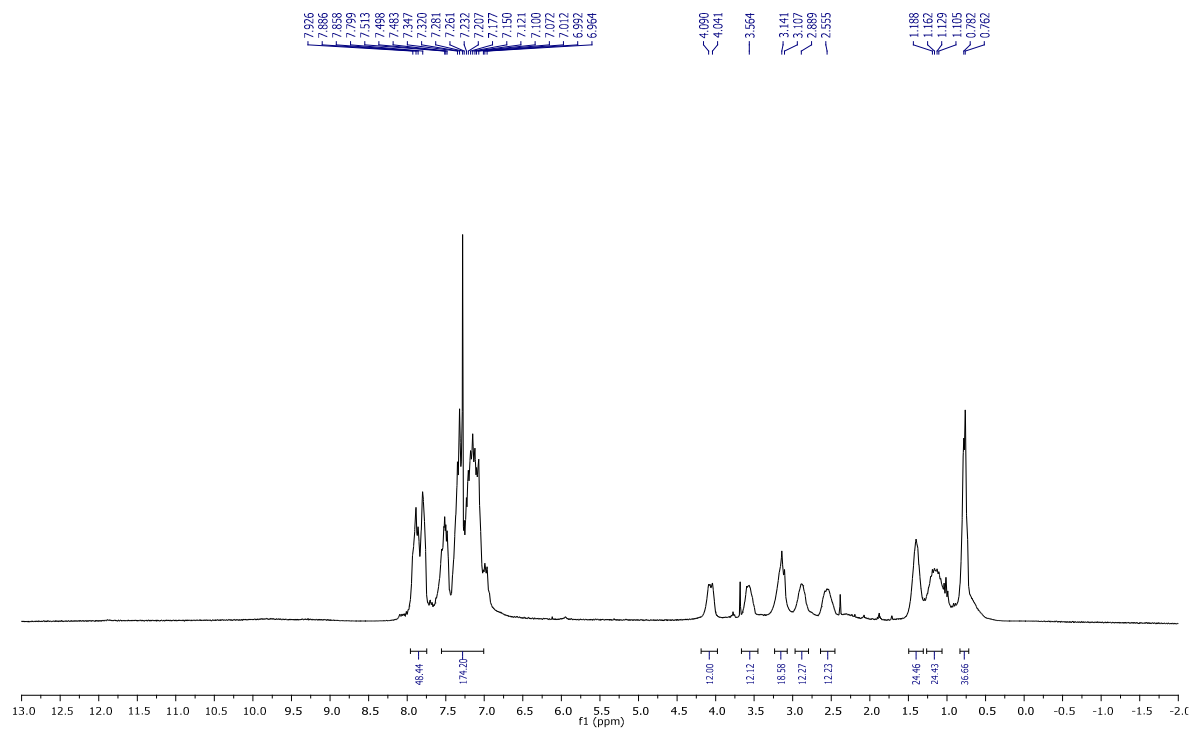

G1,  $^{13}\text{C}$   $\{^1\text{H}\}$  NMR (62 MHz,  $\text{CDCl}_3$ )

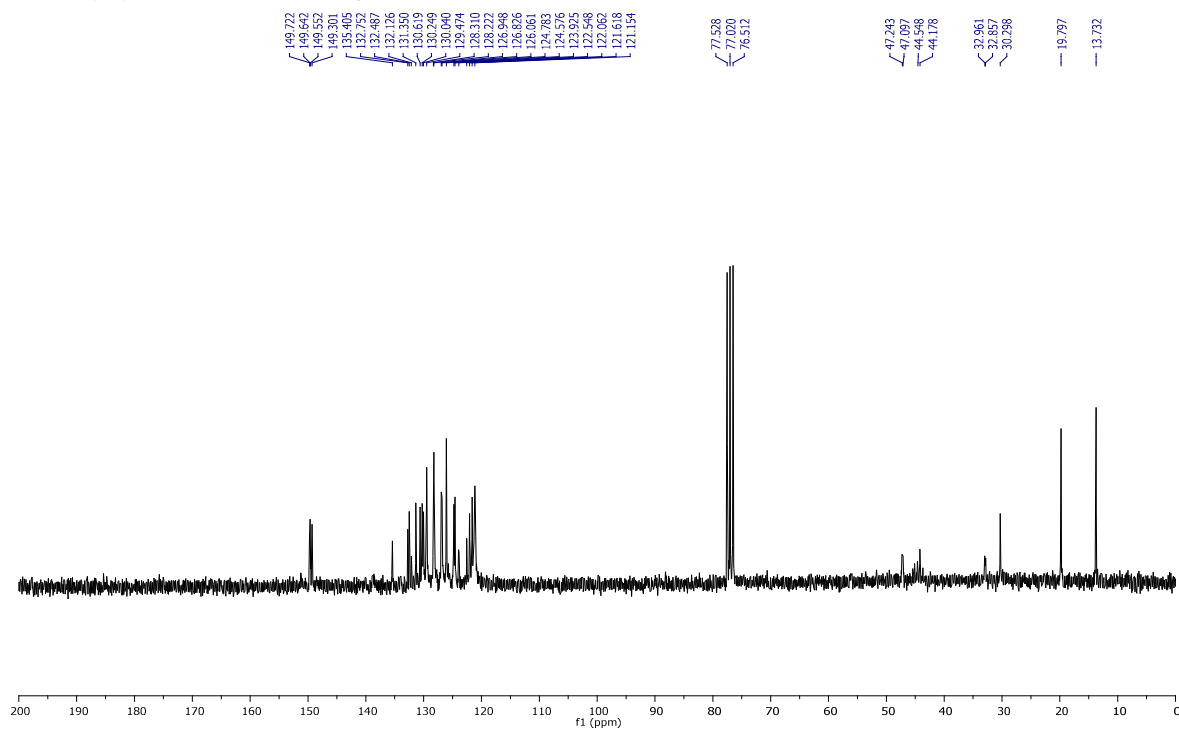

G2,  $^{31}\text{P}$  { $^1\text{H}$ } NMR (121 MHz,  $\text{CDCl}_3$ )

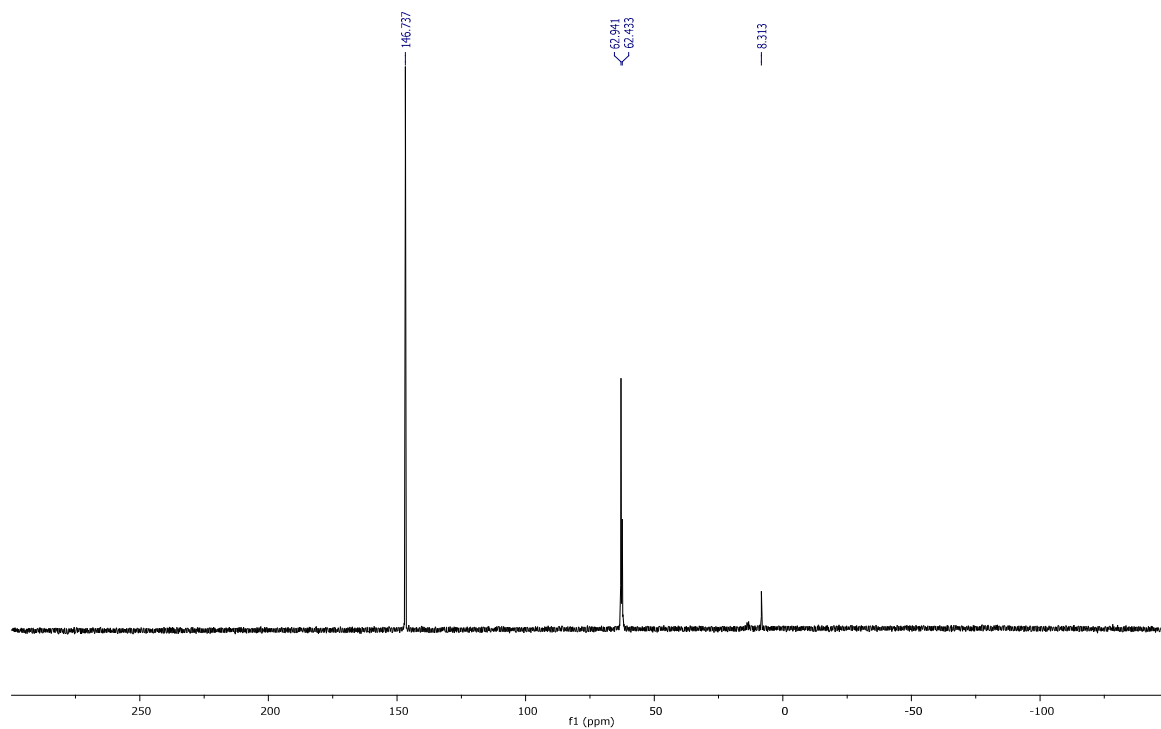

G2,  $^1\text{H}$  NMR (300 MHz,  $\text{CDCl}_3$ )

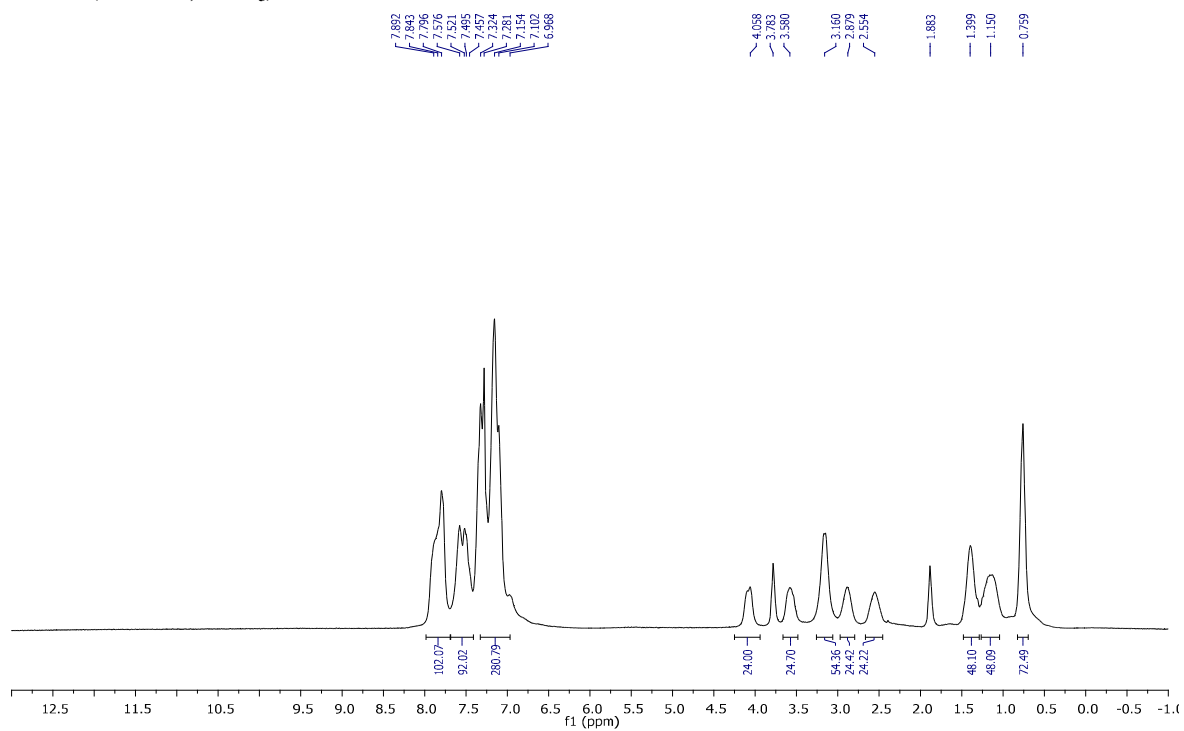

G2,  $^{13}\text{C}\{^1\text{H}\}$ -RMN (75 MHz,  $\text{CDCl}_3$ )  $\delta$  (ppm):

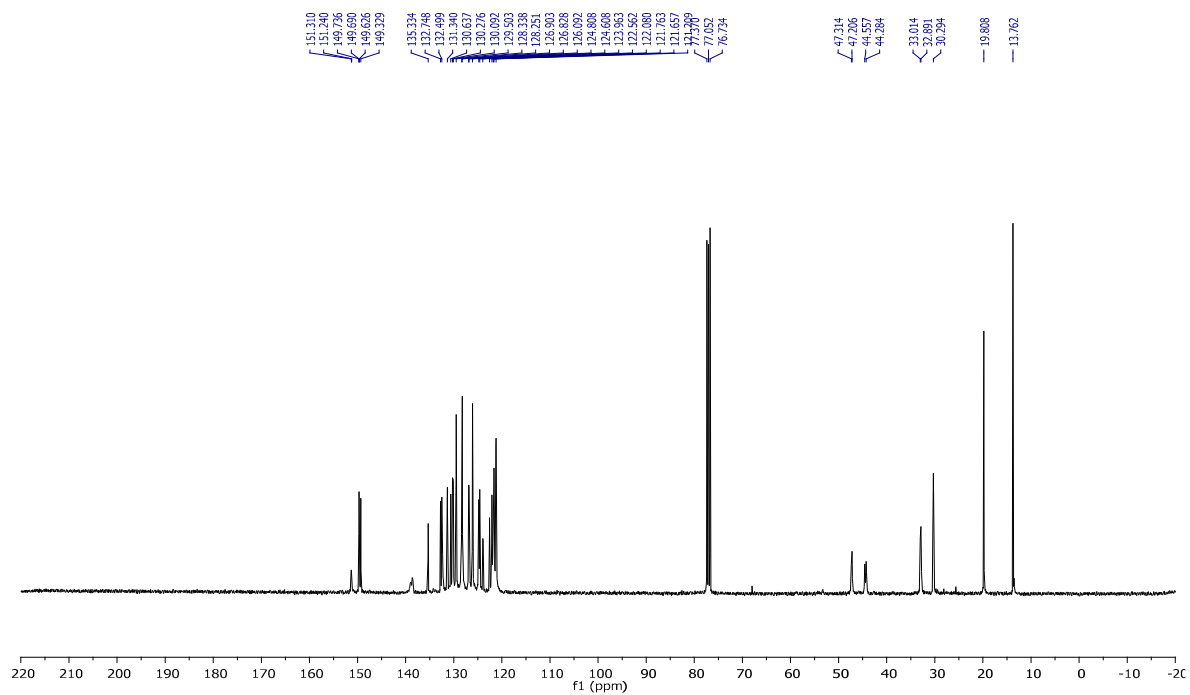

G3,  $^{31}\text{P}\{^1\text{H}\}$ -RMN (121 MHz,  $\text{CDCl}_3$ )  $\delta$  (ppm):

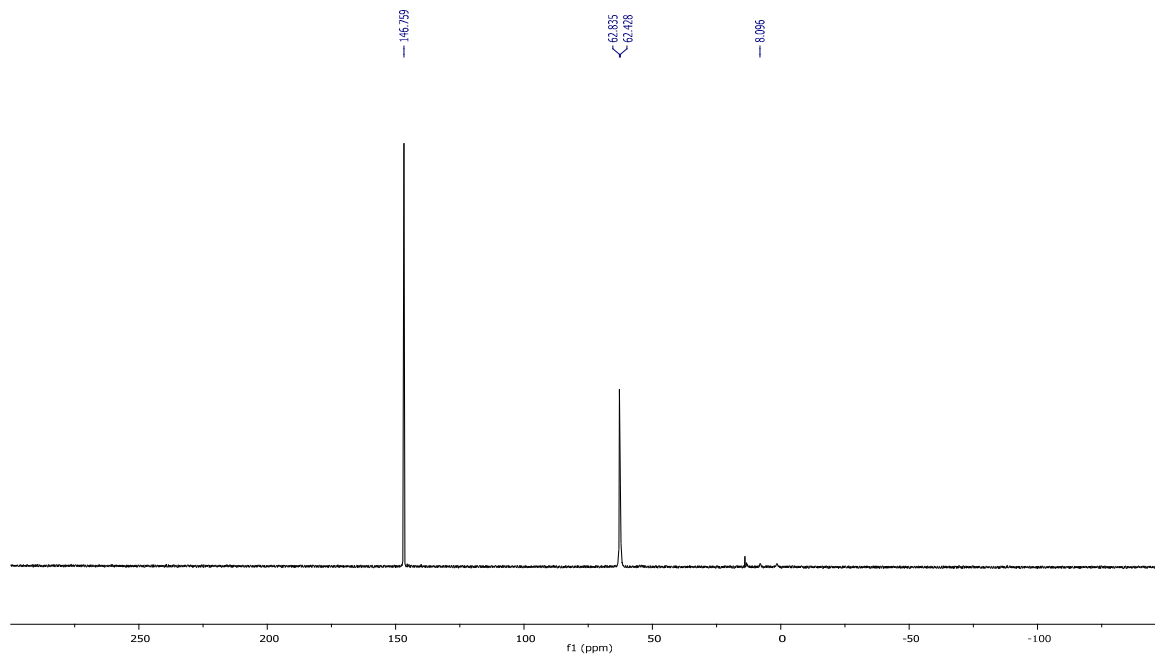

G3, <sup>1</sup>H NMR (400 MHz, CDCl<sub>3</sub>)

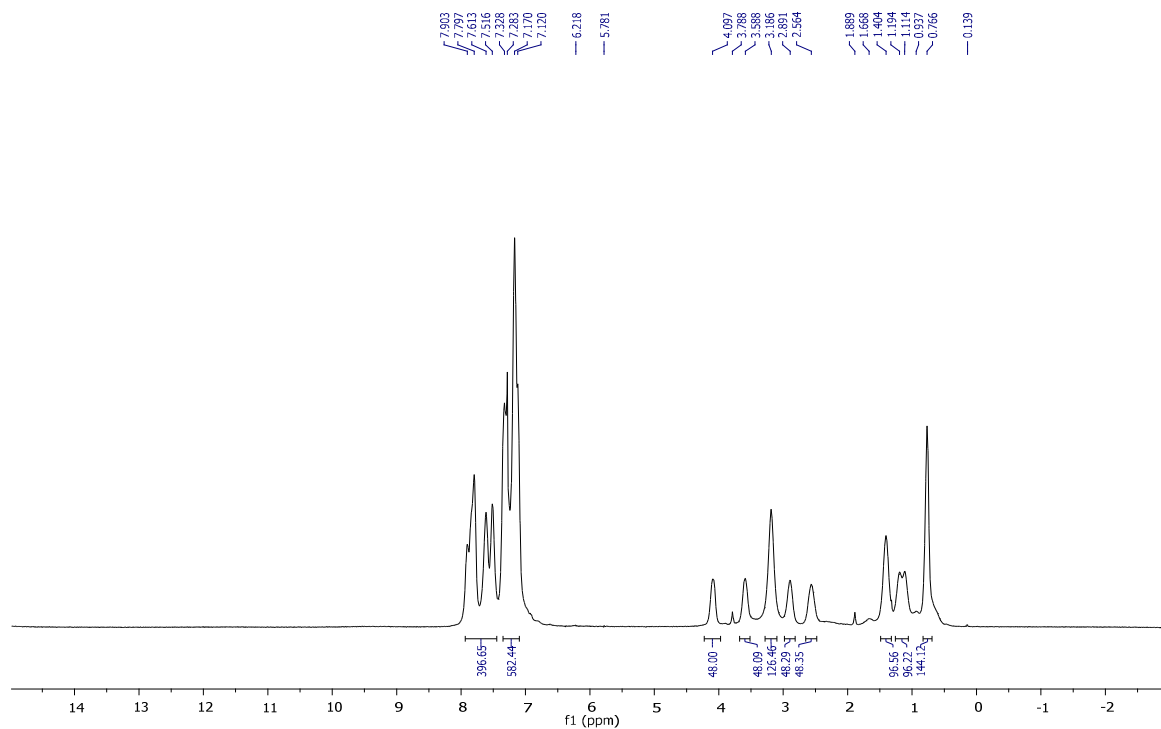

G3, <sup>13</sup>C {<sup>1</sup>H} NMR (100 MHz, CDCl<sub>3</sub>)

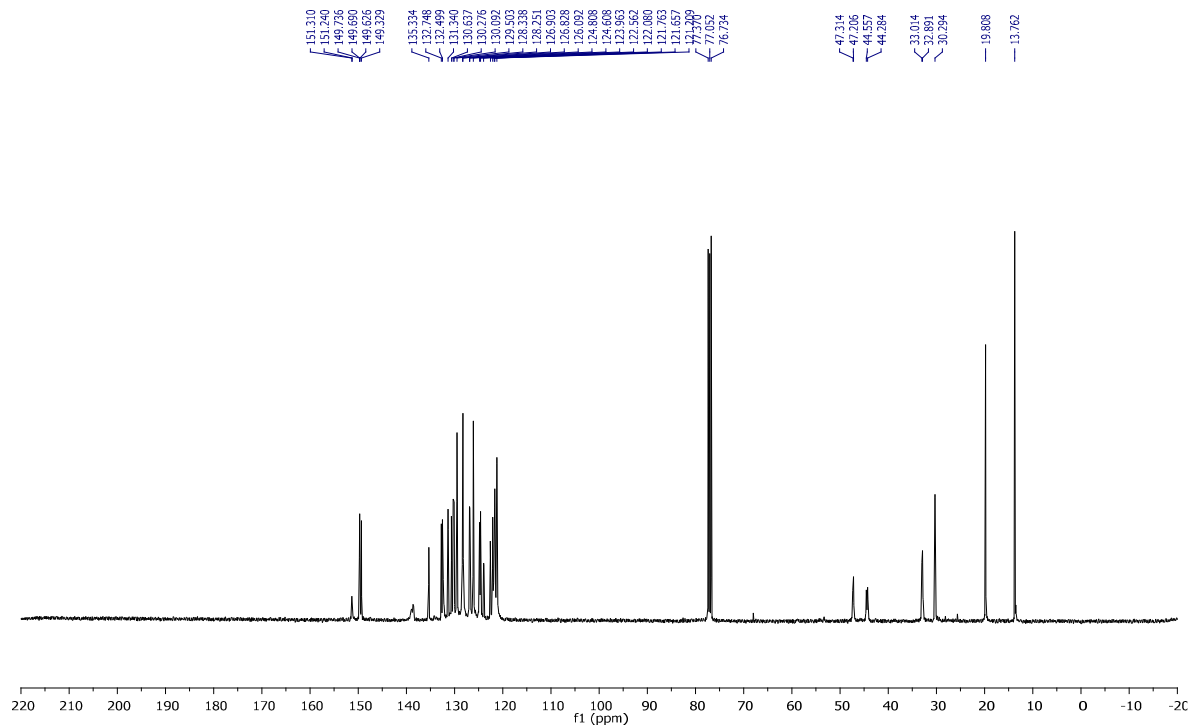

## 11. $^{31}\text{P}$ $\{^1\text{H}\}$ NMR, $^1\text{H}$ NMR and $^{13}\text{C}$ $\{^1\text{H}\}$ NMR spectra of M and B

M,  $^{31}\text{P}$   $\{^1\text{H}\}$  NMR (121 MHz,  $\text{CDCl}_3$ )

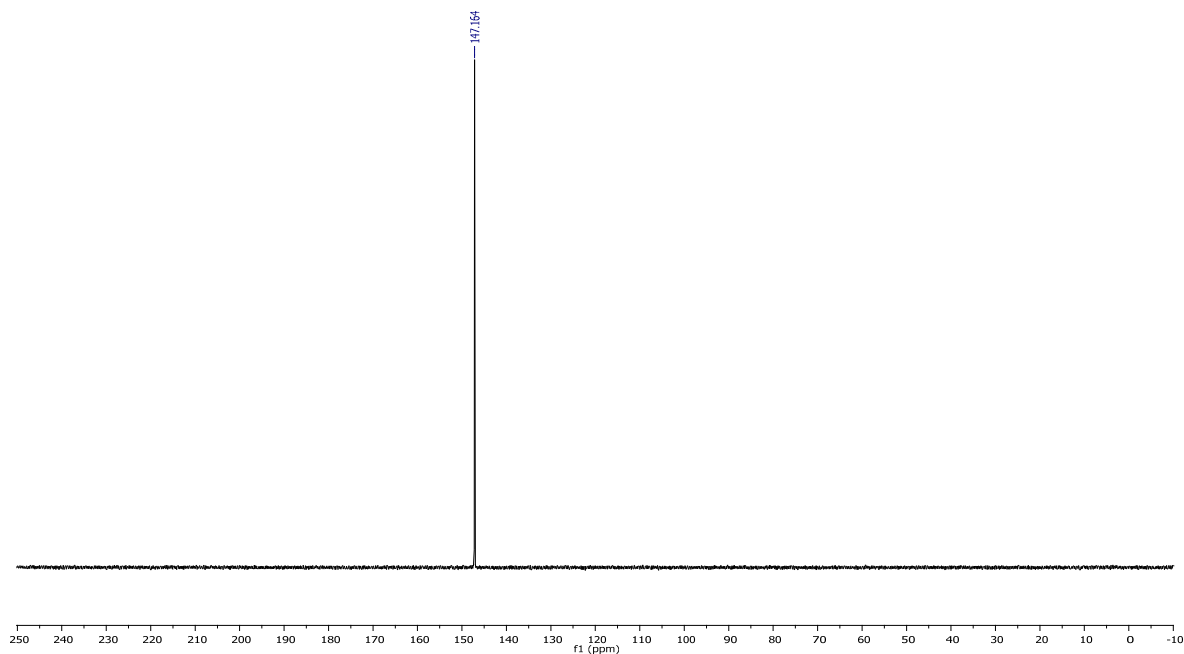

M,  $^1\text{H}$  NMR (300 MHz,  $\text{CDCl}_3$ )

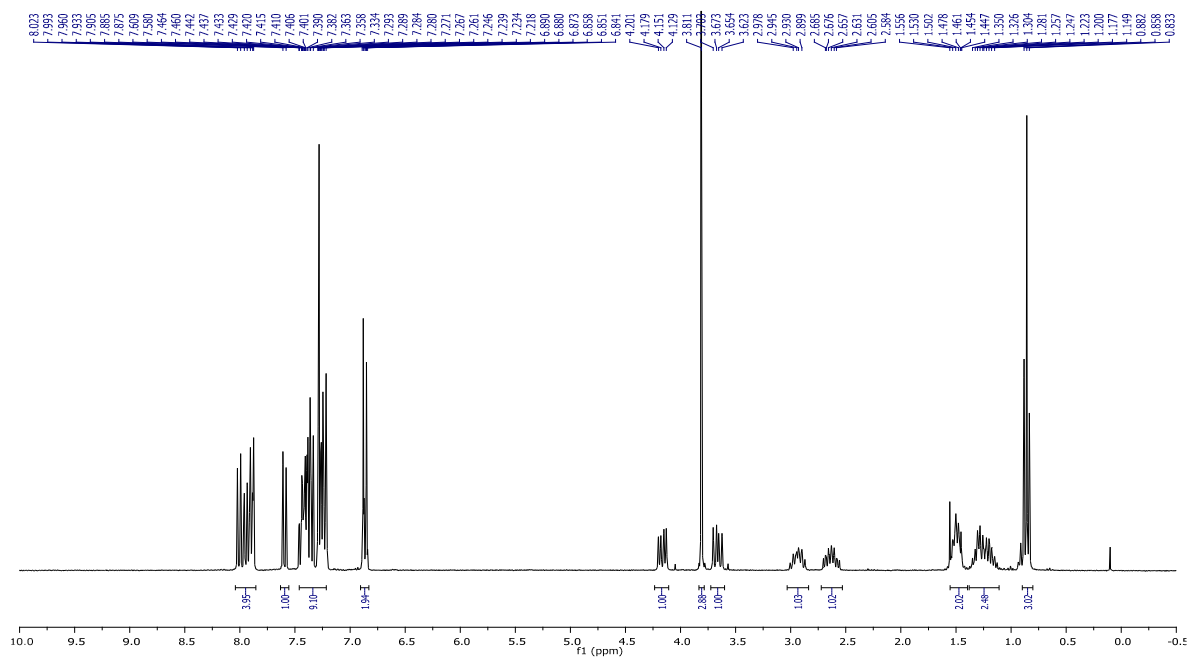

M,  $^{13}\text{C}$  { $^1\text{H}$ } NMR (75 MHz,  $\text{CDCl}_3$ )

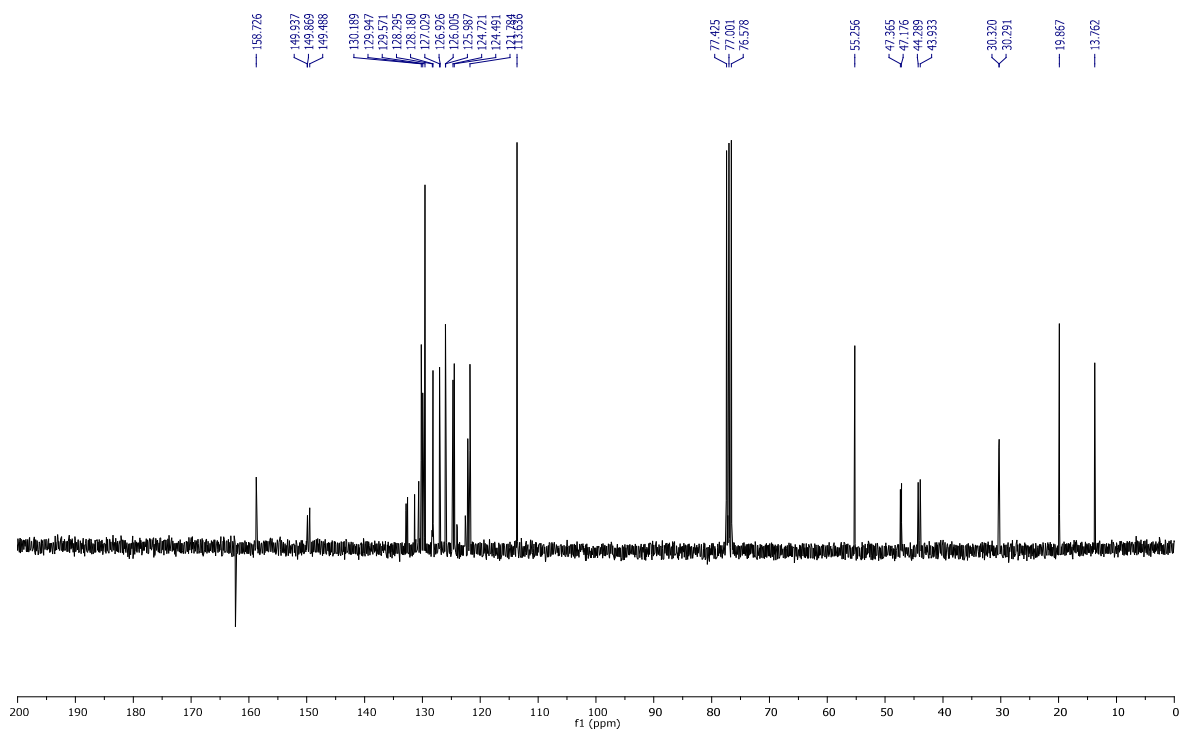

B,  $^{31}\text{P}$  { $^1\text{H}$ } NMR (162 MHz,  $\text{CDCl}_3$ )

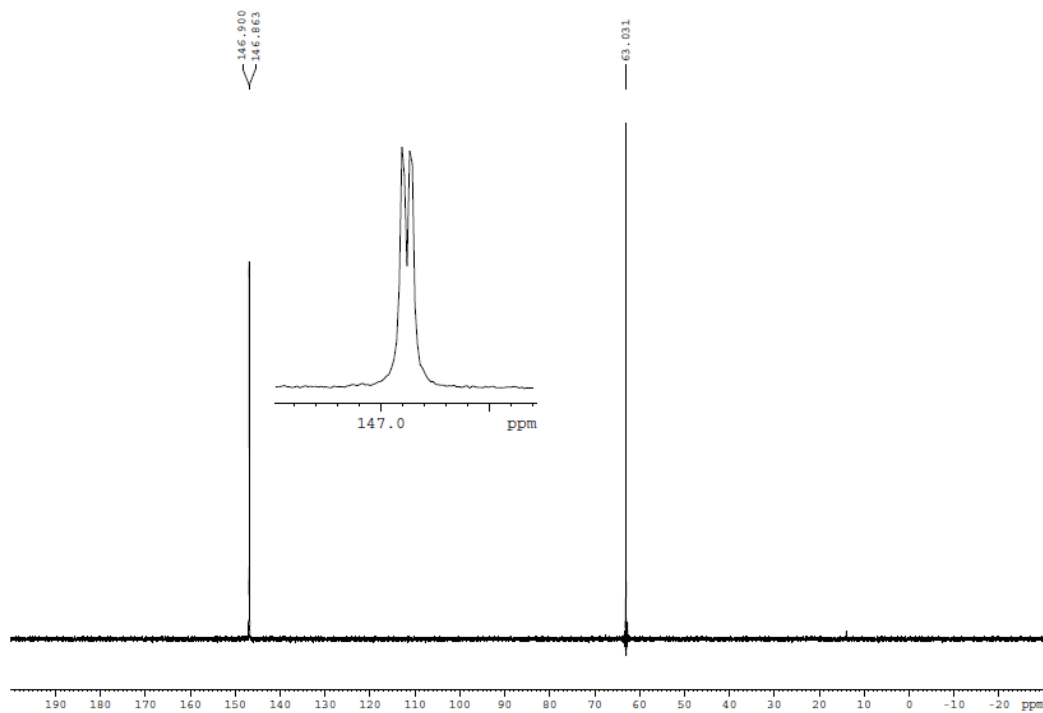

B,  $^1\text{H}$  NMR (400 MHz,  $\text{CDCl}_3$ )

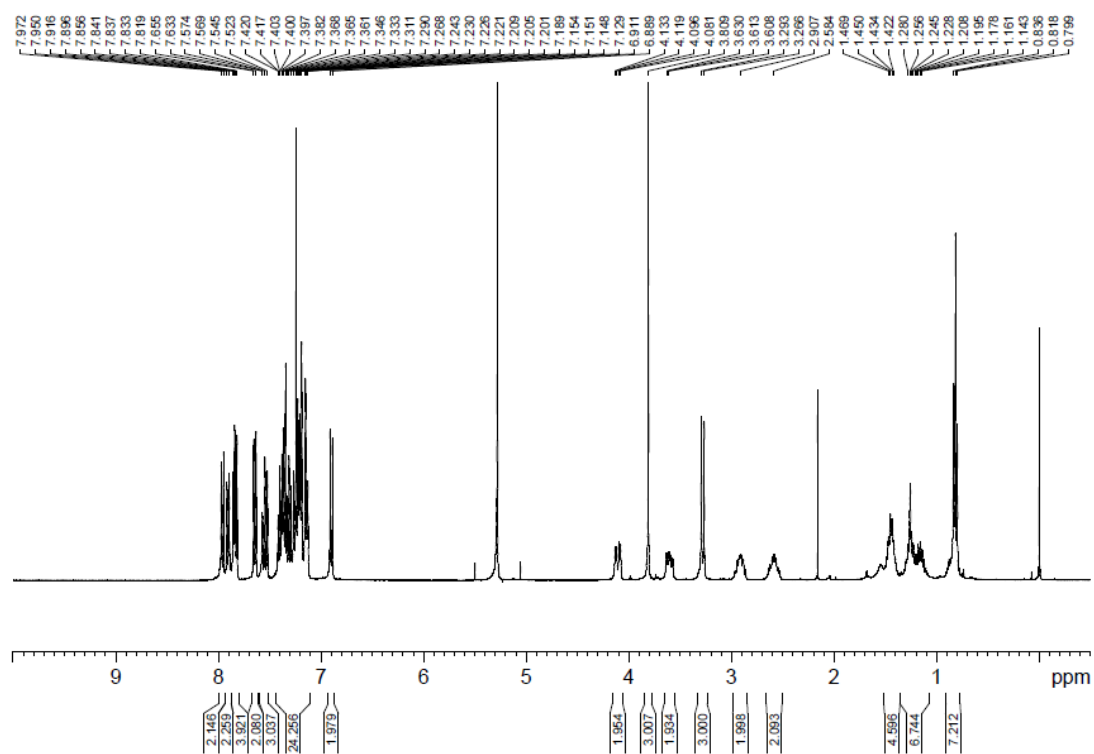

B,  $^{13}\text{C}$   $\{^1\text{H}\}$  NMR (100 MHz,  $\text{CDCl}_3$ )

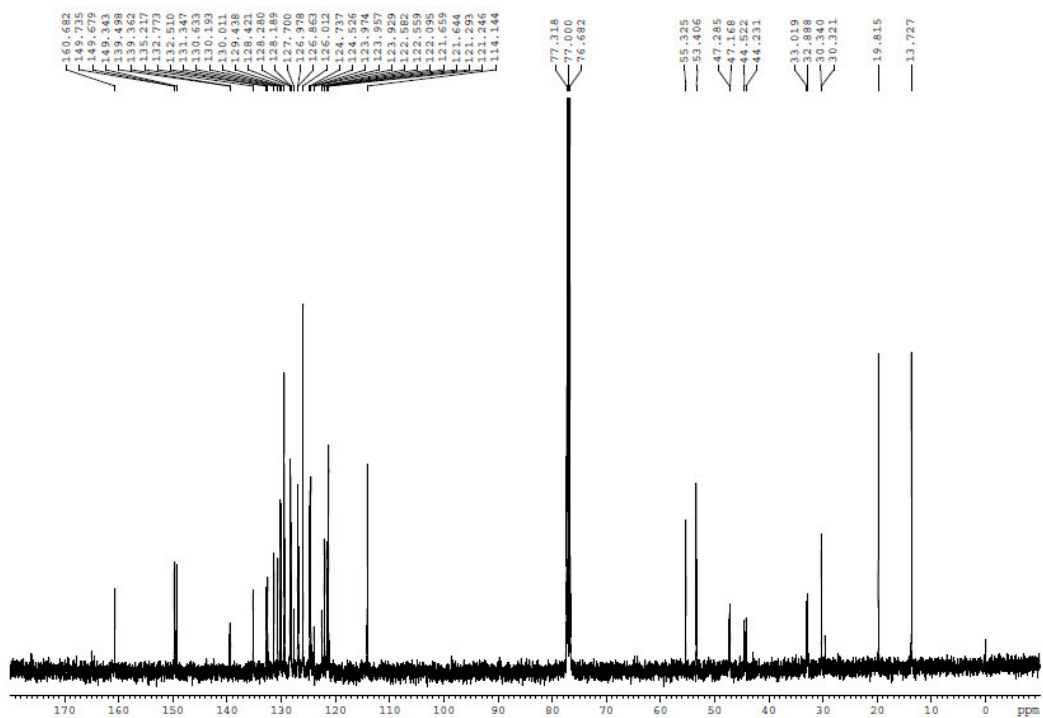



## 12. HPLC chromatograms of compounds 5

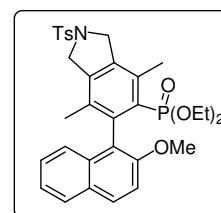

### Racemic mixture:

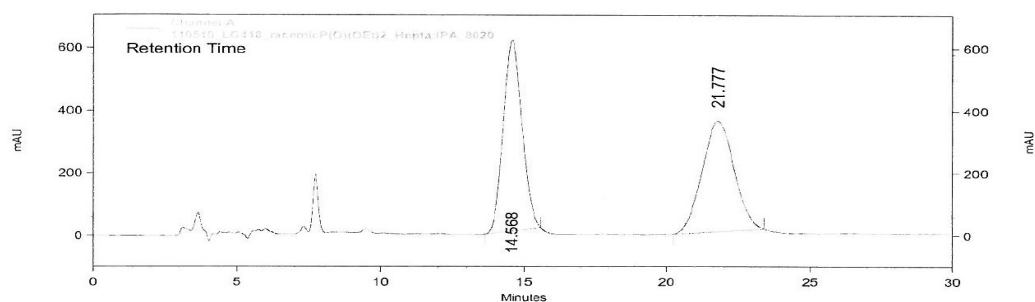

#### UV-254nm Results (Reprocessed)

| Name | Retention Time | Area     | Height | Area Percent | Integration Codes |
|------|----------------|----------|--------|--------------|-------------------|
|      | 14.568         | 28112744 | 609910 | 50.71        | MM                |
|      | 21.777         | 27324548 | 354275 | 49.29        | MM                |

|        |  |          |        |        |  |
|--------|--|----------|--------|--------|--|
| Totals |  | 55437292 | 964185 | 100.00 |  |
|--------|--|----------|--------|--------|--|

### - Entry 1, Table 2:

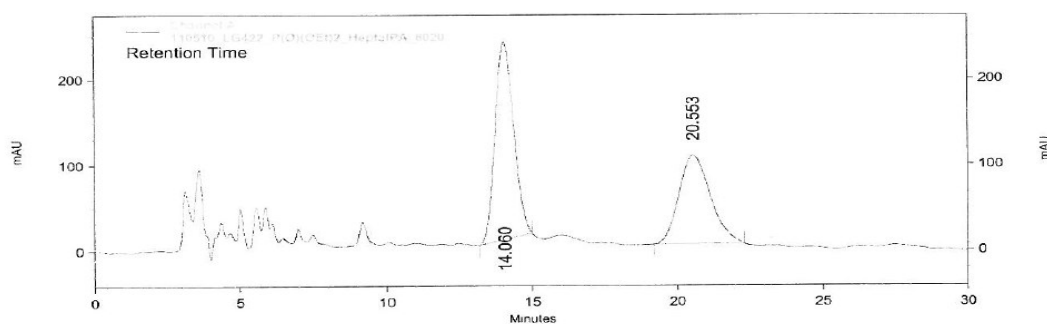

#### UV-254nm Results (Reprocessed)

| Name | Retention Time | Area     | Height | Area Percent | Integration Codes |
|------|----------------|----------|--------|--------------|-------------------|
|      | 14.060         | 10242685 | 230446 | 56.83        | MM                |
|      | 20.553         | 7781231  | 103330 | 43.17        | MM                |

|        |  |          |        |        |  |
|--------|--|----------|--------|--------|--|
| Totals |  | 18023916 | 333776 | 100.00 |  |
|--------|--|----------|--------|--------|--|

- **Entry 2, Table 2:**

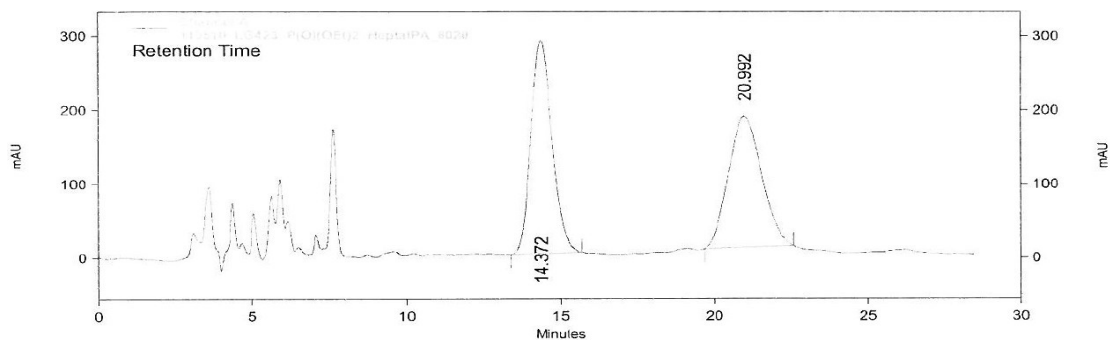

**UV-254nm  
 Results  
 (Reprocessed)**

| Name   | Retention Time | Area     | Height | Area Percent | Integration Codes |
|--------|----------------|----------|--------|--------------|-------------------|
|        | 14.372         | 13840413 | 288432 | 50.81        | MM                |
|        | 20.992         | 13400347 | 177400 | 49.19        | MM                |
| Totals |                | 27240760 | 465832 | 100.00       |                   |

- **Entry 3, Table 2:**

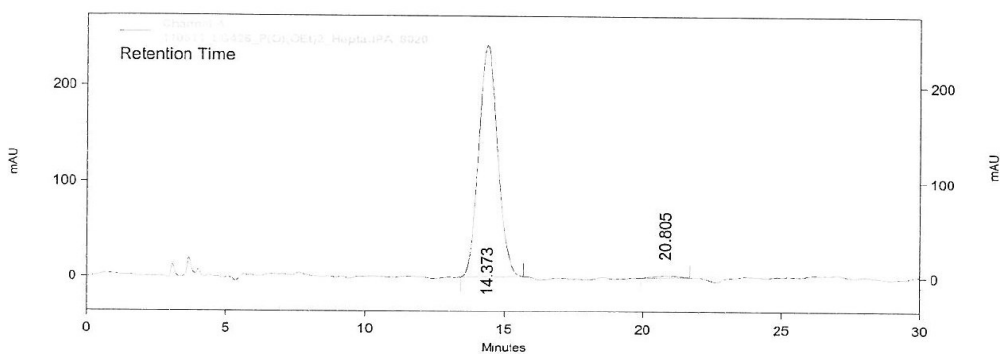

**UV-254nm  
 Results (Original)**

| Name   | Retention Time | Area     | Height | Area Percent | Integration Codes |
|--------|----------------|----------|--------|--------------|-------------------|
|        | 14.373         | 11678498 | 242637 | 98.87        | MM                |
|        | 20.805         | 133310   | 2308   | 1.13         | MM                |
| Totals |                | 11811808 | 244945 | 100.00       |                   |

Free = 981

- **Entry 4, Table 2:**

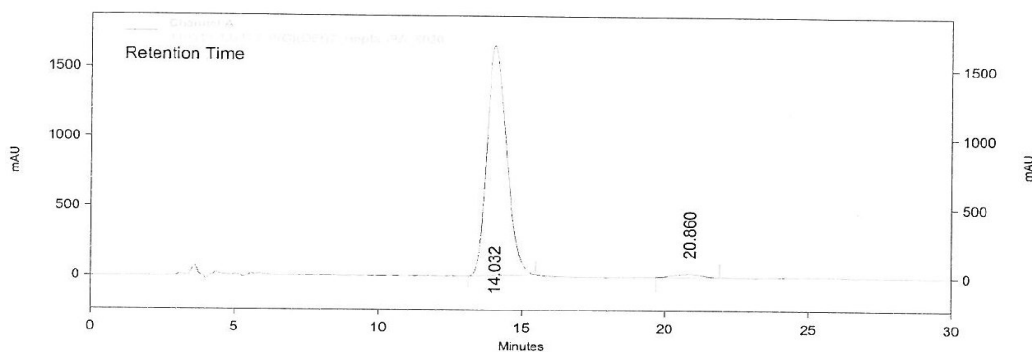

**UV-254nm  
 Results (Original)**

| Name          | Retention Time | Area     | Height  | Area Percent | Integration Codes |
|---------------|----------------|----------|---------|--------------|-------------------|
|               | 14.032         | 79987670 | 1658301 | 98.08        | MM                |
|               | 20.860         | 1562039  | 22825   | 1.92         | MM                |
| ) 196 / ee    |                |          |         |              |                   |
| <b>Totals</b> |                | 81549709 | 1681126 | 100.00       |                   |

- **Entry 5, Table 2:**

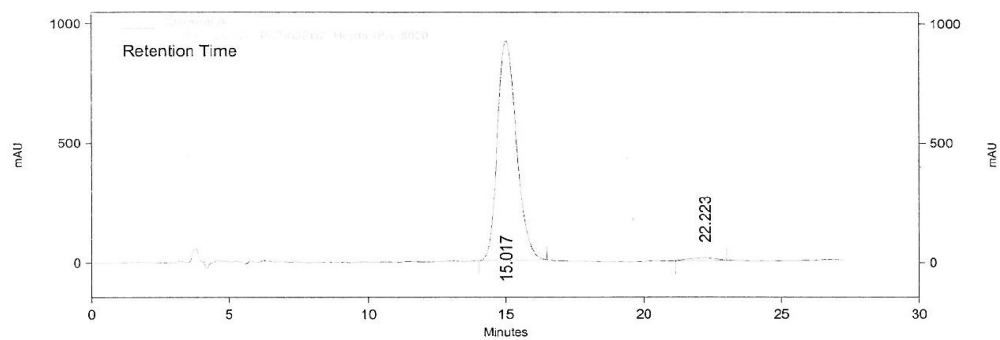

**UV-254nm  
 Results (Reprocessed)**

| Name          | Retention Time | Area     | Height | Area Percent | Integration Codes |
|---------------|----------------|----------|--------|--------------|-------------------|
|               | 15.017         | 44140118 | 918656 | 98.43        | MM                |
|               | 22.223         | 705265   | 10872  | 1.57         | MM                |
| ) 197 / ee    |                |          |        |              |                   |
| <b>Totals</b> |                | 44845383 | 929528 | 100.00       |                   |

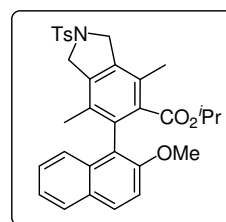

- **Racemic mixture:**

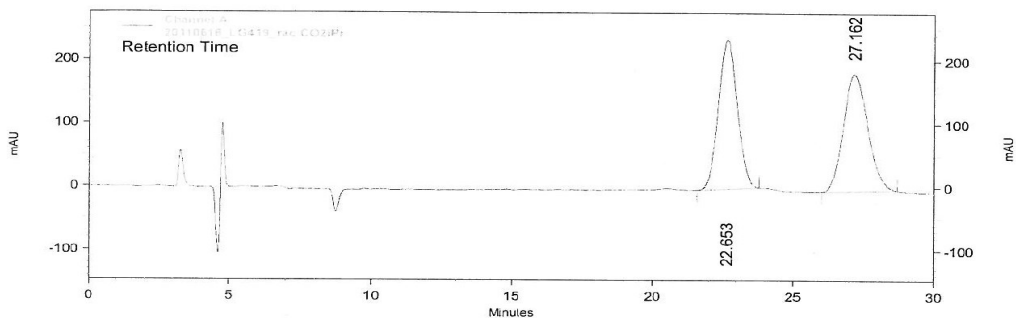

**UV-254nm  
 Results  
 (Reprocessed)**

| Name | Retention Time | Area     | Height | Area Percent | Integration Codes |
|------|----------------|----------|--------|--------------|-------------------|
|      | 22.653         | 11158325 | 235426 | 49.94        | MM                |
|      | 27.162         | 11186485 | 185219 | 50.06        | MM                |

|        |  |          |        |        |  |
|--------|--|----------|--------|--------|--|
| Totals |  | 22344810 | 420645 | 100.00 |  |
|--------|--|----------|--------|--------|--|

- **Entry 6, Table 2:**

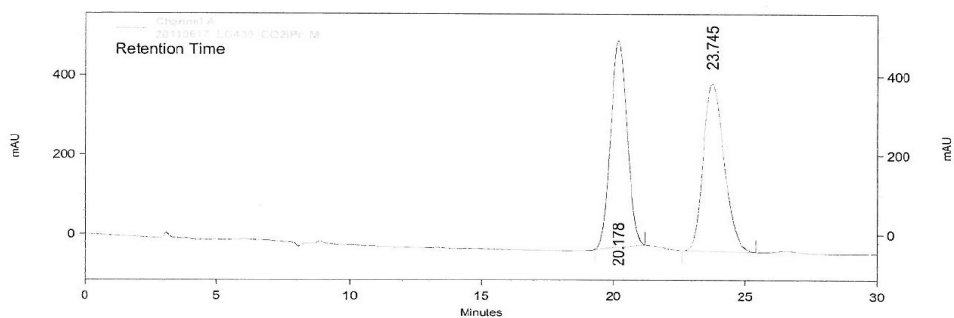

**UV-254nm  
 Results  
 (Reprocessed)**

| Name | Retention Time | Area     | Height | Area Percent | Integration Codes |
|------|----------------|----------|--------|--------------|-------------------|
|      | 20.178         | 22606332 | 521334 | 48.93        | MM                |
|      | 23.745         | 23594847 | 423859 | 51.07        | MM                |

|        |  |          |        |        |  |
|--------|--|----------|--------|--------|--|
| Totals |  | 46201179 | 945193 | 100.00 |  |
|--------|--|----------|--------|--------|--|

- **Entry 7, Table 2:**

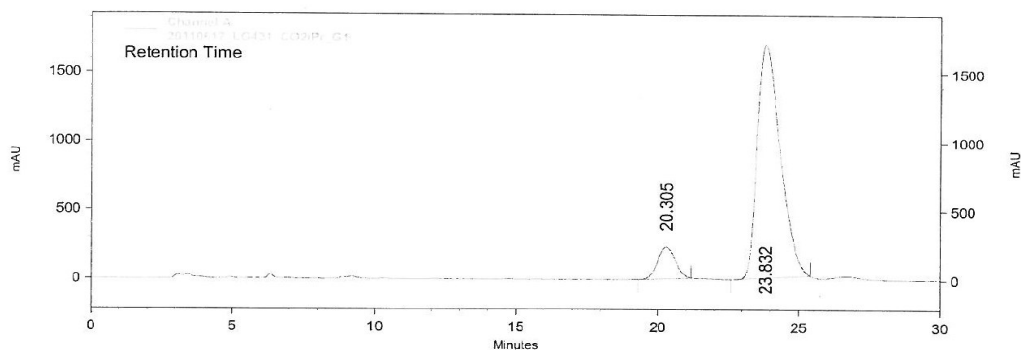

**UV-254nm  
 Results (Original)**

| Name          | Retention Time | Area      | Height  | Area Percent | Integration Codes |
|---------------|----------------|-----------|---------|--------------|-------------------|
|               | 20.305         | 10006971  | 230849  | 9.47         | MM                |
|               | 23.832         | 95659636  | 1696217 | 90.53        | MM                |
| <b>Totals</b> |                |           |         |              |                   |
|               |                | 105666607 | 1927066 | 100.00       |                   |

- **Entry 8, Table 2:**

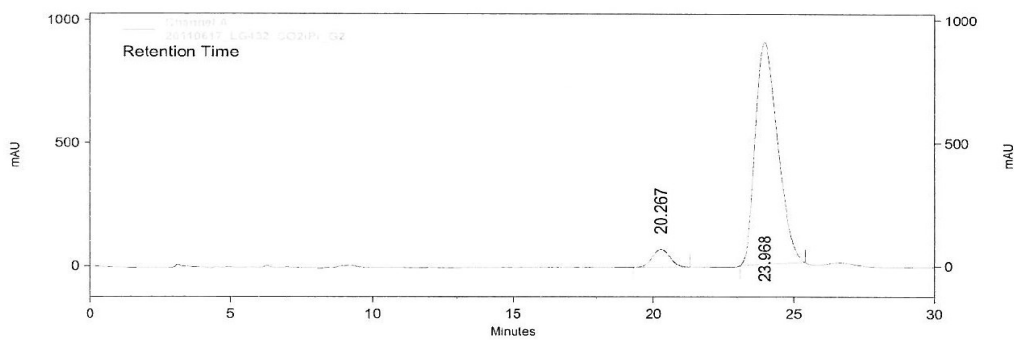

**UV-254nm  
 Results (Reprocessed)**

| Name          | Retention Time | Area     | Height | Area Percent | Integration Codes |
|---------------|----------------|----------|--------|--------------|-------------------|
|               | 20.267         | 3106192  | 71885  | 5.85         | MM                |
|               | 23.968         | 49994658 | 903543 | 94.15        | MM                |
| <b>Totals</b> |                |          |        |              |                   |
|               |                | 53100850 | 975428 | 100.00       |                   |

- **Entry 9, Table 2:**

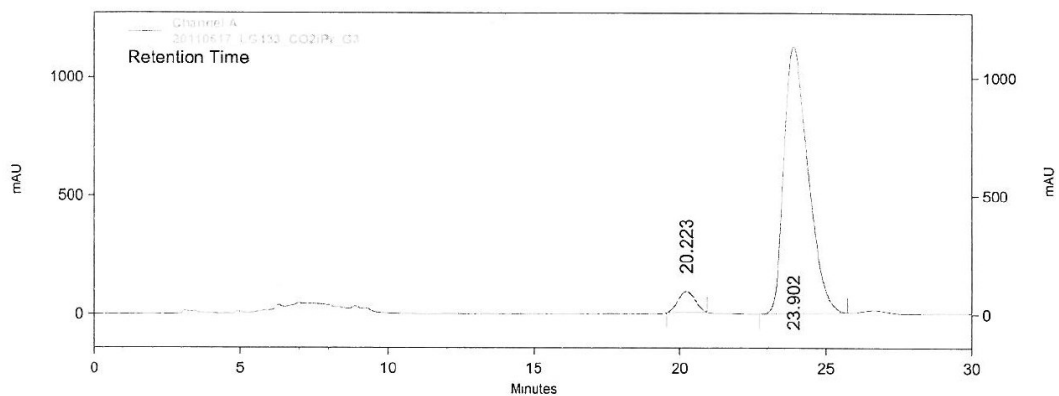

**UV-254nm  
 Results  
 (Reprocessed)**

| Name | Retention Time | Area     | Height  | Area Percent | Integration Codes |
|------|----------------|----------|---------|--------------|-------------------|
|      | 20.223         | 3517959  | 87472   | 5.20         | MM                |
|      | 23.902         | 64136963 | 1126726 | 94.80        | MM                |

*80/22*

|        |  |          |         |        |  |
|--------|--|----------|---------|--------|--|
| Totals |  | 67654922 | 1214198 | 100.00 |  |
|--------|--|----------|---------|--------|--|
